# Supplementary material for: Mapping Global Risk of Bat and Rodent Borne Disease Outbreaks to Anticipate Emerging Threats
Source: Research Square preprint supplement (doi:10.21203/rs.3.rs-5459426/v1), 2025-04-25
Supplement: Supplementary file 1 [file 6ce54c11d5e44941c95e04de.docx]

Mapping Global Risk of Bat and Rodent Borne Disease Outbreaks to Anticipate Emerging Threats

Supplementary material

The global distributions of bat- and rodent-borne diseases developed in this study can be downloaded in its native 5 minutes per arc second resolution from <https://github.com/soushie13/Insights-for-Preventing-Disease-X/tree/main>

The distribution raster and some of the other covariates used can soon be visualized and downloaded from <https://mood-platform.avia-gis.com/core>

All data including geographical occurrence points, list of included articles/reports from which the data points were extracted, model evaluation (AUC, convergence plots) can be accessed through the GitHub repository: <https://github.com/soushie13/Insights-for-Preventing-Disease-X/tree/main>

## Data collection

Criteria for considering occurrence

The first outbreak a particular pathogen at each unique geographical location, i.e. village, town, city, or district (at/of a 10km radius), was taken as an outbreak occurrence point. The only oldest outbreak was included. In cases of some bat-borne diseases (European Lyssavirus 1 and 2), a single case was considered an occurrence. In currently endemic areas of a disease, only the first event was considered. No imported cases were considered.

Inclusion Criteria

Studies or reports or organizational websites with geographic coordinates or precise location of city/town/village or in some cases human settlement at a specific distance from National Park.

Exclusion Criteria

Only outbreaks in humans were considered. Studies that mentioned a region or area such as a National Park without mentioning the precise location or name of the village or town were excluded.

Search strategy

We searched for peer-reviewed reports for outbreaks of bat- and rodent-borne viral diseases (listed in the main text) by reviewing three electronic databases: Web of Science (https://www.webofscience.com), PubMed (https://pubmed.ncbi.nlm.nih.gov), and Google Scholar (https://scholar.google.com). We also searched organizational websites reported disease outbreaks, WHO Disease Outbreak News (DONs; https://www.who.int/emergencies/disease-outbreak-news) and CDC Current Outbreak List (https://www.cdc.gov/outbreaks/index.html).

Search date: The literature search was conducted from the 1st January 2024 to the 25th February 2024.

Time period: January 1960 —December 2023

The difference in data collection timeframes for bat- and rodent-borne diseases reflects variations in documented emergence patterns rather than methodological inconsistencies.

Comprehensiveness of the Search

• Search is not limited to the English language.

• Three bibliographic electronic databases were searched.

• Reports from organizations relevant outbreak monitoring, such as

WHO DON and CDC outbreak list were included.

• Forward citation chasing the selected literature to ensure the comprehensiveness of the search.

The literature included in the study can be found in the GitHub respository under data_sources.xlsx

Figure S1: PRISMA diagram outlining the data collection strategy.
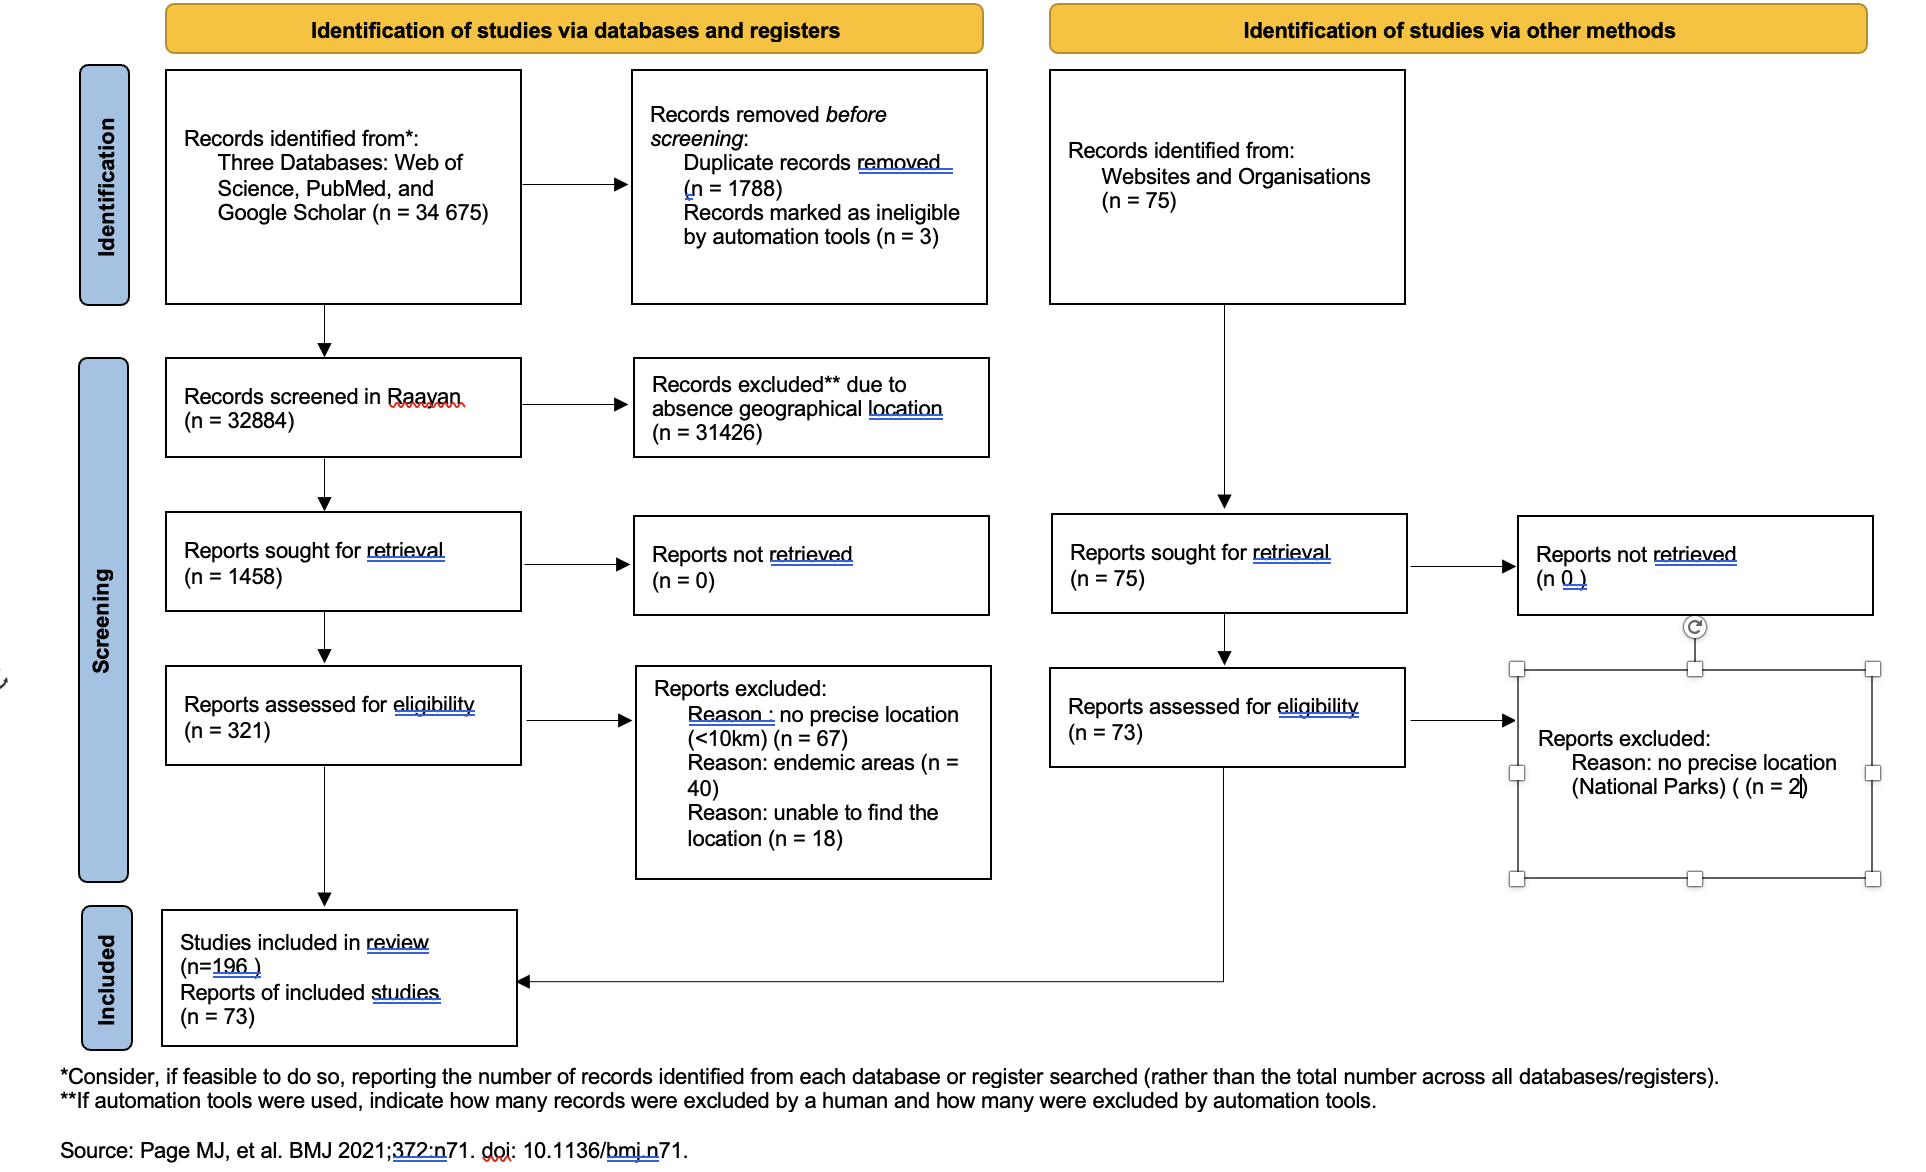


Table S1: List of reported human outbreaks of bat-borne and rodent-borne zoonoses included in this study.

| Pathogen | *Family* | Disease | Number of outbreak points in included in the study |
| --- | --- | --- | --- |
| Bat-borne diseases | | |  |
| MERS-CoV | *Coronaviridae* | Middle Eastern Respiratory Syndrome | 16 |
| SARS-CoV1 | *Coronaviridae* | Severe Acute Respiratory Syndrome | 4 |
| SARS-CoV2 | *Coronaviridae* | COVID-19 | 1 |
| Ebola Virus | *Filoviridae* | Ebola Virus Disease | 32 |
| Marburg Virus | *Filoviridae* | Marburg Virus Disease | 14 |
| Měnglà virus | *Filoviridae* | Mengla Virus Disease | 1 |
| Langya henipavirus | *Paramyoviridae* | Langya Virus Infection | 1 |
| Menangle pararubulavirus | *Paramyoviridae* | Menangle Virus Infection | 1 |
| Nipah virus | *Paramyoviridae* | Nipah Virus Infection | 24 |
| Hendra virus | *Paramyoviridae* | Hendra Virus Infection | 5 |
| Mòjiāng virus | *Paramyoviridae* | Mòjiāng virus pneumonia | 1 |
| Australian bat lyssavirus | *Rhabdoviridae* | Bat rabies | 3 |
| Duvenhage lyssavirus | *Rhabdoviridae* | Bat rabies | 3 |
| European bat 1 lyssavirus | *Rhabdoviridae* | Bat rabies | 2 |
| European bat 2 lyssavirus | *Rhabdoviridae* | Bat rabies | 8 |
| Rodent-borne diseases | | |  |
| Lassa Virus | *Arenaviridae* | Lassa Fever | 23 |
| Lujo Virus | *Arenaviridae* | Lujo Haemorrhagic Fever | 1 |
| Chapare Virus | *Arenaviridae* | Chapare hemorrhagic fever | 2 |
| Guanarito Virus | *Arenaviridae* | Guanarito hemorrhagic fever | 1 |
| Junin Virus | *Arenaviridae* | Junin hemorrhagic fever | 2 |
| Machupo Virus | *Arenaviridae* | Machupo hemorrhagic fever | 8 |
| Sabia Virus | *Arenaviridae* | Sabia hemorrhagic fever | 3 |
| Whitewater Arroyo virus | *Arenaviridae* | Whitewater Arroyo hemorrhagic fever | 2 |
| Andes orthohantavirus | *Hantaviridae* | Hantavirus Pulmonary Syndrome | 2 |
| Black Creek Canal orthohantavirus | *Hantaviridae* | Hantavirus Pulmonary Syndrome | 1 |
| Choclo orthohantavirus | *Hantaviridae* | Hantavirus Pulmonary Syndrome | 7 |
| Dobrava-Belgrade orthohantavirus | *Hantaviridae* | Hemorrhagic fever with renal syndrome | 25 |
| Hantaan orthohantavirus | *Hantaviridae* | Korean hemorrhagic fever | 1 |
| Laguna Negra orthohantavirus | *Hantaviridae* | Hantavirus Pulmonary Syndrome | 7 |
| Prospect Hill orthohantavirus | *Hantaviridae* | Hantavirus Pulmonary Syndrome | 1 |
| Puumala orthohantavirus | *Hantaviridae* | Hemorrhagic fever with renal syndrome | 11 |
| Seoul orthohantavirus | *Hantaviridae* | Hemorrhagic fever with renal syndrome | 9 |
| Sin Nombre orthohantavirus | *Hantaviridae* | Hantavirus Pulmonary Syndrome | 5 |
| Thailand virus-related hantavirus | *Hantaviridae* | Hemorrhagic fever with renal syndrome | 6 |
| Lesser known strains of orthohantavirus causing HPS/HFRS  (eg. Sochi, Tula genotypes of DOBV, Saaremaa, etc) | *Hantaviridae* | Hantavirus Pulmonary Syndrome or  Hemorrhagic fever with renal syndrome | 33 |
|  |  |  |  |

Table S2: List of locations of bat-borne disease emergence events in humans

| Year | Country | Town/village | y | x |
| --- | --- | --- | --- | --- |
| 1976 | South Sudan | Nzara | 4.633031 | 28.24863100 | SUDV |
| 1976 | Zaire | Yambuku | 2.81667 | 22.2333 | EBOV |
| 1979 | South Sudan | Nzara | 4.633031 | 28.24863100 | SUDV |
| 1994 | Gabon | Makokou | 0.566667 | 12.866667 | EBOV |
| 1995 | Zaire | Kikwit | -5.038611 | 18.818056 | EBOV |
| 1996 | Gabon | Mayibout 2 | 1.168600412 | 13.16653489 | EBOV |
| 1997 | Gabon | Booue | -0.1 | 11.933333 | EBOV |
| 2000 | Uganda | Rwot-Obillo | 2.899421989 | 32.22891817 | SUDV |
| 2001 | Gabon | Mekambo | 1.010279035 | 13.9516315 | EBOV |
| 2002 | Republic of Congo | Yembelangoye | -0.19 | 14.345 | EBOV |
| 2003 | Republic of Congo | Mbomo village | 0.493742157 | 14.67872268 | EBOV |
| 2004 | south Sudan | Yambio town | 4.575884038 | 28.39791061 | SUDV |
| 2005 | Republic of Congo | Etombi | 0.023198156 | 14.89057669 | EBOV |
| 2007 | Democratic republic of Congo | Ndongo 2 | -5.223909594 | 21.42030166 | EBOV |
| 2007 | Uganda | Bundibugyo | 0.708198728 | 30.06199708 | BDBV |
| 2008 | Democratic republic of Congo | Mweka | -4.848548992 | 21.56453055 | EBOV |
| 2011 | Uganda | Nakisamata village | 0.64847 | 32.72498 | SUDV |
| 2012 | Uganda | Kibale | 0.789957865 | 31.07737498 | SUDV |
| 2012 | Democratic republic of Congo | Isiro | 2.760106023 | 27.63122084 | BDBV |
| 2012 | Uganda | Nyimbwa | 0.62010922 | 32.53455627 | SUDV |
| 2013 | Guinea | Meliandou | 8.616038923 | -10.06116103 | EBOV |
| 2014 | democratic republic of Congo | Ikanamongo Village | -0.423716691 | 20.58726183 | EBOV |
| 2017 | democratic republic of Congo | Likali | 3.362214311 | 23.88497413 | EBOV |
| 2018 | democratic republic of Congo | Ikoko-Impenge | -0.736329225 | 18.42126917 | EBOV |
| 2018 | democratic republic of Congo | Mangina | 0.605101918 | 29.30920385 | EBOV |
| 2020 | democratic republic of Congo | Mbandaka | 0.039565514 | 18.27347942 | EBOV |
| 2021 | democratic republic of Congo | Benia | 0.022375777 | 28.66952231 | EBOV |
| 2021 | Guinea | Gouecke | 8.028159602 | -8.721712582 | EBOV |
| 2021 | democratic republic of Congo | beni | 0.493561786 | 29.45579395 | EBOV |
| 2022 | Uganda | Madudu | 0.685486955 | 31.48144639 | SUDV |
| 2022 | Democratic republic of Congo | Beni | 0.493561786 | 29.45579395 | EBOV |
| 2023 | Democratic republic of Congo | Mbandaka | 0.04059228 | 18.26991011 | EBOV |
| 1980 | Kenya | Kitum Cave | 1.032378484 | 34.75814964 | MARV |
| 1987 | Kenya | Kitum Cave | 1.032378484 | 34.75814964 | RAVV |
| 1998 | Democratic republic of Congo | Goroumbwa | 3.100221339 | 29.58356215 | MARV & RAVV |
| 2004 | Angola | Uige | -7.608487222 | 15.06585302 | MARV |
| 2007 | Uganda | Kitaka mines | 0.227685303 | 30.37429637 | MARV & RAVV |
| 2008 | Uganda | Python cave | -0.358195879 | 29.92673444 | MARV |
| 2008 | Uganda | Python cave | -0.358195879 | 29.92673444 | MARV |
| 2012 | Uganda | Kitwe | -0.127433727 | 30.50537942 | MARV |
| 2014 | Uganda | Mpigi | 0.228397164 | 32.32001886 | MARV |
| 2017 | Uganda | Tulwo | 1.385047306 | 34.64138286 | MARV |
| 2021 | Guinea | Temessadou M Boke | 8.53501354 | -10.22959439 | MARV |
| 2022 | Ghana | Ashanti region | 6.257876467 | -1.531725046 | MARV |
| 2023 | Equatorial Guinea | Nsock Nsomo | 1.128886251 | 11.2674021 | MARV |
| 2023 | Tanzania | Goziba Island | -1.471818317 | 32.61009214 | MARV |
| 2009 | Democratic Republic of Congo | Mangala | -4.650072888 | 18.93759898 | BASV |
| 1996 | Australia | Rockhampton | -23.34373237 | 150.5398431 | Australian bat lyssavirus |
| 1996 | Australia | Mackay | -21.1430338 | 149.1815197 | Australian bat lyssavirus |
| 2012 | Australia | Whitsundays | -20.27545095 | 148.9984774 | Australian bat lyssavirus |
| 1969 | Nigeria | Ibadan | 7.411258122 | 3.894205068 | Mokola lyssavirus |
| 1971 | Nigeria | Ibadan | 7.40874606 | 3.871960254 | Mokola lyssavirus |
| 1970 | South Africa | NW Province | -25.7476754 | 26.75573712 | Duvenhage lyssavirus |
| 2006 | South Africa | NW Province | -25.38446179 | 26.5450554 | Duvenhage lyssavirus |
| 2007 | Kenya | camp | -3.191479713 | 38.47345725 | Duvenhage lyssavirus |
| 2002 | United Kingdom | Guthrie | 56.64410445 | -2.708746283 | European bat 2 lyssavirus |
| 1998 | Malaysia | Ipoh | 4.726213405 | 101.0949881 | Nipah |
| 2001 | India | Siliguri | 26.71092766 | 88.42774411 | Nipah |
| 2001 | Bangladesh | Chandpur | 23.84674827 | 88.64662108 | Nipah |
| 2003 | Bangladesh | Bil Joania | 24.80702489 | 88.63525765 | Nipah |
| 2004 | Bangladesh | Kazipara | 23.86936788 | 89.37781868 | Nipah |
| 2004 | Bangladesh | Fairidpur | 23.637393 | 89.76052135 | Nipah |
| 2005 | Bangladesh | Basail | 24.22886259 | 90.0514558 | Nipah |
| 2007 | India | Belechuapara | 23.81467458 | 88.56680905 | Nipah |
| 2007 | Bangladesh | Haripur | 25.84414124 | 88.1360684 | Nipah |
| 2007 | Bangladesh | Sadar Kushtia | 23.84352999 | 89.09612448 | Nipah |
| 2008 | Bangladesh | Manikganj | 23.74820629 | 89.71692527 | Nipah |
| 2010 | Bangladesh | Bhanga | 23.403281 | 89.98188996 | Nipah |
| 2011 | Bangladesh | Hatibandha | 26.14025923 | 89.13675786 | Nipah |
| 2018 | India | Peramba | 11.56410411 | 75.75874759 | Nipah |
| 2019 | India | Vavakkad | 10.16665194 | 76.20870352 | Nipah |
| 2021 | India | Chathamangalam | 11.29115403 | 75.91531978 | Nipah |
| 2023 | Bangladesh | Natore | 24.40921163 | 88.9729078 | Nipah |
| 2023 | India | Maruthonkara | 11.65119487 | 75.80144435 | Nipah |
| 2023 | Bangladesh | Pabna | 24.00634524 | 89.27561379 | Nipah |
| 2023 | Bangladesh | Rajshahi | 24.39926437 | 88.61699253 | Nipah |
| 2023 | Bangladesh | Shariatpur | 23.21995573 | 90.34718399 | Nipah |
| 2023 | Bangladesh | Rajbari | 23.76934532 | 89.66095119 | Nipah |
| 2023 | Bangladesh | Narsingdi | 23.97416703 | 90.73601786 | Nipah |
| 2023 | Bangladesh | Naogoan | 24.75838636 | 88.94765812 | Nipah |
| 2012 | China | Tongguan | 23.28924003 | 101.3734947 | Mojiang |
| 2018 | China | Langya | 35.07685626 | 118.8269416 | Langya |
| 1994 | Australia | Hendra | -27.41993839 | 153.0752767 | Hendra |
| 1994 | Australia | Mackay | -21.14409669 | 149.1768331 | Hendra |
| 2004 | Australia | Cairns | -16.8758878 | 145.7336655 | Hendra |
| 2008 | Australia | Redland | -27.58446545 | 153.2605878 | Hendra |
| 2009 | Australia | Cawarral | -23.24939317 | 150.6750369 | Hendra |
| 1997 | Australia | Menangle | -34.14528902 | 150.7225295 | Menangle |
| 2012 | Saudi Arabia | Jeddah | 21.55025872 | 39.25129536 | MERS-CoV |
| 2014 | UAE | Al Ain City | 24.20877193 | 55.67219829 | MERS-CoV |
| 2015 | Saudi Arabia | Hofuf | 25.36024833 | 49.60300125 | MERS-CoV |
| 2014 | Yemen | Sana a | 15.32275329 | 44.17965205 | MERS-CoV |
| 2014 | Saudi Arabia | Najran | 17.5781076 | 44.23749031 | MERS-CoV |
| 2022 | Saudi Arabia | Taif | 21.28318423 | 40.45228273 | MERS-CoV |
| 2022 | Saudi Arabia | Muhayil | 18.54355662 | 42.05190738 | MERS-CoV |
| 2015 | Saudi Arabia | Riyadh | 24.81851756 | 46.73442778 | MERS-CoV |
| 2014 | Saudi Arabia | Wadi adDawasir | 20.44453573 | 44.81116321 | MERS-CoV |
| 2014 | Saudi Arabia | Al-Kharj | 24.16357655 | 47.32280047 | MERS-CoV |
| 2002 | China | Shunde | 22.87054999 | 113.1616816 | SARS-CoV1 |
| 2002 | China | Shenzhen | 22.53764723 | 114.0512269 | SARS-CoV1 |
| 2002 | China | Zhaoqing | 23.05743399 | 112.461819 | SARS-CoV1 |
| 2002 | China | Zhongshan | 22.52417514 | 113.3884878 | SARS-CoV1 |
| 2019 | China | Wuhan | 30.61779553 | 114.2635439 | SARS-CoV2 |
| 2015 | Saudi Arabia | Buraydah | 26.34665338 | 43.96375992 | MERS-CoV |
| 2015 | Saudi Arabia | Tayma | 27.62123507 | 38.5291913 | MERS-CoV |
| 2015 | Saudi Arabia | Khobar | 26.22526864 | 50.19758995 | MERS-CoV |
| 2022 | Qatar | Al Shahaniyah | 25.41340026 | 51.18973252 | MERS-CoV |
| 2015 | Qatar | Doha | 25.2727208 | 51.50535554 | MERS-CoV |
| 2014 | Yemen | Shibam | 15.92026469 | 48.63562701 | MERS-CoV |
| 1996 | United Kingdom | Newhaven | 50.78844819 | 0.048975784 | European bat 2 lyssavirus |
| 2016 | Finland | Inkoo | 60.0459297 | 24.00686452 | European bat 2 lyssavirus |
| 2019 | france | Limoges | 45.99142356 | 1.362385614 | European bat 1 lyssavirus |
| 1954 | germany | Hamburg | 53.46802723 | 9.94359456 | European bat 1 lyssavirus |
| 2004 | United Kingdom | Staines | 51.4266725 | -0.50181133 | European bat 2 lyssavirus |
| 2007 | germany | Bad Buchau | 48.07742657 | 9.615838974 | European bat 2 lyssavirus |
| 2015 | Norway | Valdres | 60.97231335 | 9.282654088 | European bat 2 lyssavirus |

Table S3: List of locations of rodent-borne disease outbreak emergence events in humans

| Year | Country | Town/village | y | x |
| --- | --- | --- | --- | --- |
| 1958 | Argentina | Junin | -34.58362242 | -60.95458078 | Junin |
| 1959 | Bolivia | San Joaquin | -13.04235473 | -64.67029105 | Machupo |
| 2007 | Bolivia | Magdalena | -13.2339213 | -64.19984642 | Machupo |
| 2008 | Bolivia | Huacaraje | -13.54999999 | -63.74997855 | Machupo |
| 1994 | Bolivia | Magdalena | -13.25868418 | -64.0540558 | Machupo |
| 1994 | Bolivia | Magdalena | -13.25868418 | -64.0540558 | Machupo |
| 1994 | Bolivia | Popona | -14.77655484 | -64.84214424 | Machupo |
| 2008 | Bolivia | San Ramon | -13.26243262 | -64.61556245 | Machupo |
| 1993 | Bolivia | San Ramon | -13.26243262 | -64.61556245 | Machupo |
| 2003 | Bolivia | Samuzabeti | -16.81488428 | -65.57145166 | Chapare |
| 2019 | Bolivia | Guanay | -15.49596434 | -67.88108921 | Chapare |
| 1990 | Brazil | Jardim Sabia | -23.60270846 | -46.8992028 | Sabia |
| 2019 | Brazil | Sorocaba | -23.49123959 | -47.49382517 | Sabia |
| 2019 | Brazil | Assis | -22.64051616 | -50.41513681 | Sabia |
| 1989 | Venezuela | Guanarito | 8.696722932 | -69.20910417 | Guanarito |
| 1969 | Nigeria | Lassa | 10.68205527 | 13.27183388 | Lassa |
| 2008 | Zambia | Lusaka | -15.42552314 | 28.41931052 | Lujo |
| 1999 | USA | Whitewater | 33.92502146 | -116.6341096 | WWAV |
| 2000 | USA | Arroyo Grande | 35.11900944 | -120.5825848 | WWAV |
| 1958 | Argentina | O higgins | -34.58251145 | -60.69995041 | Junin |
| 1995 | Argentina | El Bolson | -41.96701008 | -71.53510449 | Andes orthohantavirus |
| 1995 | USA | Black Creek Canal | 25.55061577 | -80.35140688 | Black Creek Canal orthohantavirus |
| 1997 | USA | Lehigh County | 40.67527851 | -75.6999894 | Monongahela virus |
| 1997 | USA | Cresco | 41.156094 | -75.28015437 | Monongahela virus |
| 1993 | USA | Navajo | 35.88803384 | -109.0313026 | Sin Nombre orthohantavirus |
| 1995 | USA | Blue River | 38.94350922 | -94.56175797 | Blue River virus |
| 1951 | South Korea | Hantan River | 38.00728959 | 127.0166693 | Hantaan orthohantavirus |
| 1985 | Slovenia | Dobrava | 45.85522373 | 14.96944427 | Dobrava-Belgrade orthohantavirus |
| 1994 | South Korea | Seoul | 37.54316319 | 126.9928289 | Seoul orthohantavirus |
| 1980 | Finland | Puumala | 61.52356343 | 28.17826617 | Puumala orthohantavirus |
| 1999 | Thailand | Bangkok | 13.76274007 | 100.5315671 | Thailand virus-related hantavirus |
| 1997 | Paraguay | Filadelfia | -22.3520162 | -60.03281605 | Laguna Negra Virus |
| 1997 | Paraguay | Fortin Toledo | -22.22277204 | -60.43688122 | Laguna Negra Virus |
| 1997 | Paraguay | Montania | -21.98029502 | -60.04819975 | Laguna Negra Virus |
| 1997 | Paraguay | San Lowen | -22.30637333 | -59.90301479 | Laguna Negra Virus |
| 1997 | Paraguay | Monte Palma | -22.6058255 | -59.53078634 | Laguna Negra Virus |
| 1997 | Paraguay | Estancia Carau | -22.96817162 | -59.46226147 | Laguna Negra Virus |
| 2015 | Sri Lanka | Kandy | 7.296066642 | 80.63394772 | Thailand virus-related hantavirus |
| 2015 | Sri Lanka | Kegalle | 7.256847412 | 80.34443369 | Thailand virus-related hantavirus |
| 2013 | Sri Lanka | Polonnaruwa | 7.948400147 | 81.00782146 | Thailand virus-related hantavirus |
| 1952 | Bosnia | Fojnica | 43.96221138 | 17.89897855 | Dobrava-Belgrade orthohantavirus |
| 1961 | Serbia | Fruska Gora | 45.15721112 | 19.71440802 | Dobrava-Belgrade orthohantavirus |
| 1954 | Slovenia | Pohorje | 46.31474485 | 15.98532472 | Dobrava-Belgrade orthohantavirus |
| 1967 | Bosnia | Foca | 43.50541405 | 18.77908917 | Dobrava-Belgrade orthohantavirus |
| 1967 | Croatia | Plitvice | 44.86435052 | 15.58341477 | Dobrava-Belgrade orthohantavirus |
| 1995 | Bosnia | Tuzla | 44.53865762 | 18.67859605 | Dobrava-Belgrade orthohantavirus |
| 2002 | Croatia | Ivanovac | 45.48283851 | 18.63820754 | Dobrava-Belgrade orthohantavirus |
| 1983 | Greece | Tsepelovo | 39.90495493 | 20.81983789 | Puumala orthohantavirus |
| 1982 | Swedan | Dalarna | 61.33727962 | 14.16304563 | Puumala orthohantavirus |
| 1995 | France | Alsace | 48.40727827 | 7.499540525 | Puumala orthohantavirus |
| 1984 | Germany | Baden Wuttemberg | 48.44705382 | 8.437356384 | Puumala orthohantavirus |
| 2022 | Panama | Tonosi | 7.406977927 | -80.44201592 | Choclo |
| 2022 | Panama | La Villa de los Santos | 7.943510352 | -80.40425802 | Choclo |
| 2022 | Panama | Las Tablas | 7.769755817 | -80.27530265 | Choclo |
| 2022 | Panama | Pese | 7.908489132 | -80.61340313 | Choclo |
| 2022 | Panama | Ocu | 7.942829125 | -80.77535367 | Choclo |
| 2022 | Panama | Nata | 8.335902623 | -80.51944975 | Choclo |
| 2022 | Panama | Penonome | 8.518853122 | -80.35735981 | Choclo |
| 2012 | USA | Curry Village | 37.73825849 | -119.5766075 | HPS |
| 2012 | USA | High Sierra Camps | 37.90949293 | -119.4190343 | HPS |
| 2016 | USA | Grand Forks | 47.92441901 | -97.03108242 | HPS |
| 2000 | Bolivia | Bermejo | -22.7315974 | -64.33897596 | Bermejo |
| 2011 | Brazil | Castelo dos Sonhos | -8.315698906 | -55.09986164 | Castelo dos Sonhos |
| 2012 | Brazil | Araraquara | -21.78399688 | -48.1876002 | Araraquara |
| 2008 | Brazil | Juquitiba | -23.9316288 | -47.07032525 | Juquitiba |
| 2011 | Brazil | Careiro da Varzea | -3.197660186 | -59.82521817 | Rio mamore |
| 1996 | Bolivia | Rio mamore | -16.83590021 | -64.79439735 | Rio mamore |
| 2011 | Uruguay | Lechiguanas | -33.43399938 | -59.69995966 | Lechiguanas |
| 1990 | Venezuela | Cano Delgadito | 8.791670513 | -69.45028521 | Cano Delgadito |
| 1993 | Louisana | La | 32.40112368 | -92.0363685 | Bayou |
| 1974 | China | Longquan | 28.06874722 | 119.1410307 | Gou |
| 1964 | India | Thottapalayam | 12.93394541 | 79.13440888 | Thottapalayam |
| 1990 | Russia | Kurkino | 53.43529067 | 38.66021344 | Dobrava-Belgrade orthohantavirus |
| 2000 | Russia | Lipetsk | 52.60709133 | 39.57719981 | Dobrava-Belgrade orthohantavirus |
| 2006 | Russia | Dobrinka | 52.03946505 | 40.5674934 | Dobrava-Belgrade orthohantavirus |
| 2006 | Russia | Lavrovka | 52.23763837 | 40.77077523 | Dobrava-Belgrade orthohantavirus |
| 2008 | Russia | Sochi | 43.60071628 | 39.73269806 | Sochi genotype Dobrava-Belgrade orthohantavirus |
| 2012 | Germany | Heidelbery | 49.40777657 | 8.680587493 | Puumala orthohantavirus |
| 2014 | Russia | Krasnodar | 44.99416204 | 39.07360434 | Sochi genotype Dobrava-Belgrade orthohantavirus |
| 2004 | Germany | Rostock | 54.08827744 | 12.11398675 | Saaremaa orthohantavirus |
| 2004 | Germany | Kiel | 54.31834505 | 10.12874268 | Saaremaa orthohantavirus |
| 2004 | Germany | Lubeck | 53.86479448 | 10.68849904 | Saaremaa orthohantavirus |
| 2004 | Germany | Greifswald | 54.08650798 | 13.37443963 | Saaremaa orthohantavirus |
| 2004 | Germany | Gustrow | 53.7945177 | 12.17880007 | Saaremaa orthohantavirus |
| 2004 | Germany | Potsdam | 52.40019454 | 13.06058422 | Dobrava-Belgrade orthohantavirus |
| 2004 | Germany | Neuruppin | 52.92146714 | 12.80601571 | Dobrava-Belgrade orthohantavirus |
| 2004 | Germany | Hamburg | 53.54920286 | 9.961526322 | Dobrava-Belgrade orthohantavirus |
| 2004 | Germany | Bradenburg | 52.41335896 | 12.55090805 | Dobrava-Belgrade orthohantavirus |
| 2004 | Germany | Demmin | 53.90990657 | 13.02662868 | Dobrava-Belgrade orthohantavirus |
| 2004 | Germany | Magdeburg | 52.11877529 | 11.63147428 | Dobrava-Belgrade orthohantavirus |
| 2004 | Germany | Cottbus | 51.75669949 | 14.33775997 | Dobrava-Belgrade orthohantavirus |
| 2004 | Germany | Altenburg | 50.98327328 | 12.434879 | Dobrava-Belgrade orthohantavirus |
| 2004 | Germany | Chemnitz | 50.82866401 | 12.91793666 | Dobrava-Belgrade orthohantavirus |
| 2004 | Germany | Fulda | 50.55362519 | 9.668717939 | Dobrava-Belgrade orthohantavirus |
| 2021 | France | Saint Claude | 46.38518948 | 5.861601336 | Puumala orthohantavirus |
| 2015 | France | Melun | 48.53020334 | 2.658756307 | Tula genotype dobv |
| 2014 | France | Dijon | 47.3182403 | 5.027234621 | Seoul orthohantavirus |
| 2015 | France | Erize-Saint-Dizier | 48.81459837 | 5.282478659 | Seoul orthohantavirus |
| 2016 | France | Turckheim | 48.08531798 | 7.27790737 | Seoul orthohantavirus |
| 2016 | Netherlands | Arnhem | 51.96824761 | 5.899766257 | Prospect Hill orthohantavirus |
| 1982 | USA | Prospect Hill | 36.24937881 | -79.19105666 | Seoul orthohantavirus |
| 2006 | Honduras | Catacamas | 14.85377917 | -85.89934476 | Catacamas orthohantavirus |
| 2002 | Bolivia | Concepcion | -16.13060999 | -62.0286165 | Laguna Negra Virus |
| 2011 | Peru | Iquitos | -3.697699385 | -73.2791828 | Andes orthohantavirus |
| 2008 | French Guinea | Maripa | 3.816127477 | -51.88849259 | Maripa virus |
| 2008 | South Korea | Muju-gun | 35.93528195 | 127.7134028 | Muju virus |
| 1996 | Brazil | Flexal | -20.28522058 | -40.38043902 | Flexal |
| 1975 | Colombia | Pichinde | 3.435043237 | -76.61661101 | Pichinde |
| 2019 | Guinea | Kissidougou | 9.19985205 | -10.10158366 | Lassa |
| 1972 | Guinea | Bambaya | 9.287642071 | -10.41957199 | Lassa |
| 1972 | Guinea | Dandou | 9.193570789 | -9.900960409 | Lassa |
| 1972 | Guinea | Telekoro | 9.450037756 | -10.70942269 | Lassa |
| 1972 | Guinea | Yende | 8.887804627 | -10.17021056 | Lassa |
| 1972 | Liberia | Zorzor | 7.776762949 | -9.428498902 | Lassa |
| 1935 | Nigeria | Makurdi | 7.697293293 | 8.557313059 | Lassa |
| 1952 | Nigeria | Rahama | 10.8890221 | 8.127271154 | Lassa |
| 1956 | Sierra Leonne | Segbwema | 7.99806311 | -10.9492425 | Lassa |
| 1970 | Nigeria | Vom | 9.730105036 | 8.791919393 | Lassa |
| 1970 | Sierra Leonne | Panguma | 8.025108086 | -11.75764718 | Lassa |
| 1970 | Sierra Leonne | Tongo | 8.218621981 | -11.05707933 | Lassa |
| 1974 | Nigeria | Onitsha | 6.1469769 | 6.775936016 | Lassa |
| 1975 | Nigeria | Zonkwa | 9.873458613 | 8.03517117 | Lassa |
| 1972 | Liberia | Zigida | 8.033930793 | -9.482991075 | Lassa |
| 2011 | Ghana | Village near Manso Nkwanta | 6.465652253 | -1.902848762 | Lassa |
| 2011 | Ghana | Manso Nkwanta | 6.469283278 | -1.886539489 | Lassa |
| 2016 | Benin | Kassoula | 9.092292701 | 2.539596444 | Lassa |
| 2016 | Togo | Sandori | 10.29055223 | 0.449662105 | Lassa |
| 2017 | Benin | Tchaourou | 8.878076064 | 2.753311364 | Lassa |
| 2017 | Burkina Faso | Ouargaye | 11.50081736 | 0.052305154 | Lassa |
| 2009 | Mali | Soromba | 11.42275992 | -7.771723196 | Lassa |
| 1980 | Finland | Pieksämäki | 62.30036582 | 27.14701929 | Puumala orthohantavirus |
| 1995 | Croatia | Slunj | 45.11612865 | 15.58268335 | Dobrava-Belgrade orthohantavirus |
| 2018 | Swedan | Sorby | 59.25996431 | 15.22998921 | Puumala orthohantavirus |
| 2018 | Swedan | Ballingslov | 56.21529443 | 13.84644434 | Puumala orthohantavirus |
| 2016 | China | Gao'an | 28.40683436 | 115.3435734 | Seoul orthohantavirus |
| 2016 | China | Yifeng | 28.36744012 | 114.7488238 | Seoul orthohantavirus |
| 2016 | China | Shanggao | 28.22530427 | 114.8896843 | Seoul orthohantavirus |
| 2016 | China | Fengxin | 28.67539836 | 115.37887 | Seoul orthohantavirus |
| 2001 | Denmark | Fuenen | 55.32076083 | 10.25563784 | Saaremaa orthohantavirus |
| 2007 | Poland | Lutowiska | 49.25278787 | 22.6857742 | Saaremaa orthohantavirus |
| 2006 | Poland | Przysietnica | 49.73113266 | 22.06216707 | Puumala orthohantavirus |
| 2006 | Poland | Bukowsko | 49.47907899 | 22.06156459 | Dobrava-Belgrade orthohantavirus |
| 2007 | Poland | Odrzechowa | 49.54461637 | 21.97459403 | Dobrava-Belgrade orthohantavirus |
| 1994 | Canada | Fort St John | 56.23839333 | -120.8328255 | Sin Nombre orthohantavirus |
| 1994 | Canada | onoway | 53.70909566 | -114.1803936 | Sin Nombre orthohantavirus |
| 1994 | Canada | Vallyview | 55.06410042 | -117.2839435 | Sin Nombre orthohantavirus |
| 1994 | Canada | Camrose | 53.01147979 | -112.8303112 | Sin Nombre orthohantavirus |
| 2020 | Sri Lanka | Dambulla | 7.847442583 | 80.65087381 | Thailand virus-related hantavirus |
| 2020 | Sri Lanka | Ududumbara | 7.315476387 | 80.87830064 | Thailand virus-related hantavirus |
| 2011 | Madagascar | Anjozorobe | -18.40214399 | 47.8799333 | Anjozorobe |

## Environmental and demographic covariates

### Descriptions of the covariates

Table S4: Definitions of the various covariates used in the study.

| Covariate | Model | Definition |
| --- | --- | --- |
| Climatic covariates | | |
| Minimum temperature | Bat and Rodent | Monthly average climate data for minimum temperature in Celsius. |
| Total precipitation | Bat and Rodent | Monthly average climate data for total precipitation measured in mm. |
| Environmental covariates | | |
| Altitude | Bat and Rodent | Elevation data derived from the SRTM elevation data |
| Bat occurrence | Bat | The bat occurrence raster represent the number of bat species per pixel based on aggregated species distribution data from two sources (IUCN and biodiversitymapping.org). |
| Cropland distribution | Rodent | FGGD land cover occurrence maps are global raster datalayers where each pixel in each map contains a value representing the percentage of the area belonging to Cropland land cover type. |
| Global Human Modification of Terrestrial Systems | Bat and Rodent | Global Human Modification of Terrestrial Systems data set provides a cumulative measure of the human modification of terrestrial lands across the globe at a 1-km resolution. |
| Mammal richness index | Bat and Rodent | The 2015 Release of the Global Mammal Richness Grids data set of the Gridded Species Distribution collection are aggregations of the presence grids data for the entire class, individual families, and International Union for the Conservation of Nature (IUCN) Red List status categories |
| Rodent occurence | Rodent | The rodent occurrence raster represent the number of rodent species per pixel based on aggregated species distribution data from two sources (IUCN and biodiversitymapping.org). |
| Forest cover loss proxy for deforestation | Bat and Rodent | ‘Forest Cover Loss’ is defined as a stand-replacement disturbance, or a change from a forest to non-forest state, during the period 2000–2019. |
| Demographic covariates | | |
| Accessibility to the nearest city | Bat and Rodent | Global map of travel times to cities with more than 50,000 people in the year 2015. |
| Bushmeat activities | Bat | Geographically synthesized bushmeat data a global scale. |
| Human Population density | Bat and Rodent | The Gridded Population of the World, Version 4 (GPWv4): Population Density, Revision 11 consists of estimates of human population density (number of persons per square kilometer) based on counts consistent with national censuses and population registers, for the year 2020. |

## Background layer- Pseudo-absence points


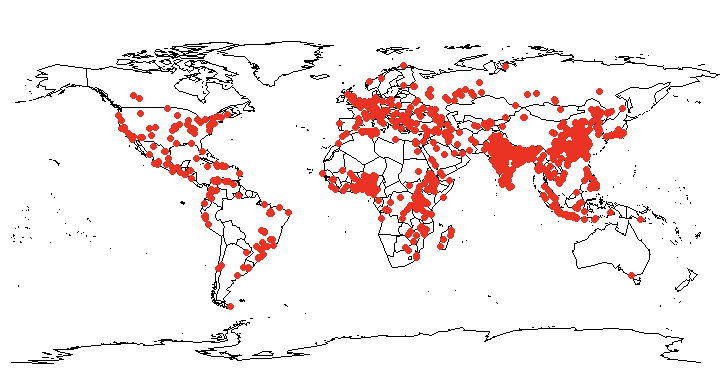


Figure S2: Distribution of pseudo-absence points that were intentionally weighed to reflect the density of more populated areas. The same set of points was used in all models in our study.

We used occurrence data obtained from our literature search, supplemented by 1,000 randomly generated pseudo-absence points that were intentionally weighed to reflect the density of more populated areas. This approach aimed to mitigate reporting bias, which can arise not only from human population density but also from variations in surveillance efforts and underreporting across different regions.

## Modelling of bat-borne diseases

We used three modeling algorithms for the model fitting: Random Forest (RF), boosted regression tree (BRT), and Bayesian binomial model. Only models with >0.5 AUC and maxTSS were selected. The models were also compared with a geographic null model to assess the predictive power of covariates. The geographic null model was generated by drawing a convex hull around the presence points.

We used two cross-validation techniques, k-fold CV and environmental CV, to estimate the prediction ability of the model on unseen data and prevent overfitting of the model. The k-fold CV creates random clusters while environmental CV approach uses clustering methods to specify sets of similar environmental conditions based on the input covariates. Occurrence data corresponding to these clusters are assigned to a fold. Clustering of the predictor covariate data and occurrence data are done using kmeans.

In this study, we used 4-folds or clusters of the occurrence and background datapoints for both approaches. With 80% of the datapoints (observation and background) used as the training dataset, and the remaining 20% data attributed to the validation dataset. The eight predictor variables were used as covariates to define the environmental conditions for the environmental block CV.

Models with an AUC or maxTSS less than 0.5 following cross-validation were excluded.

Random Forest -Bat borne diseases.

For model optimization using hyperparameter tuning, we used Random search using different combinations of tunable parameters. For RF, the tunable parameters (hyperameters) are:

mtry (number of variables randomly sampled as candidates at each split), ntrees (number of trees to grow), and node size. The parameters were later confirmed using individual grid searches.

Random Search: Node Size and ntrees

We tested the combination of node sizes (1–10) and ntrees up to 500 and evaluated the model performance using using AUC and TSS for a single hyperparameter. The final model parameters: ntree = 500, nodesize = 5, mtry = 2.


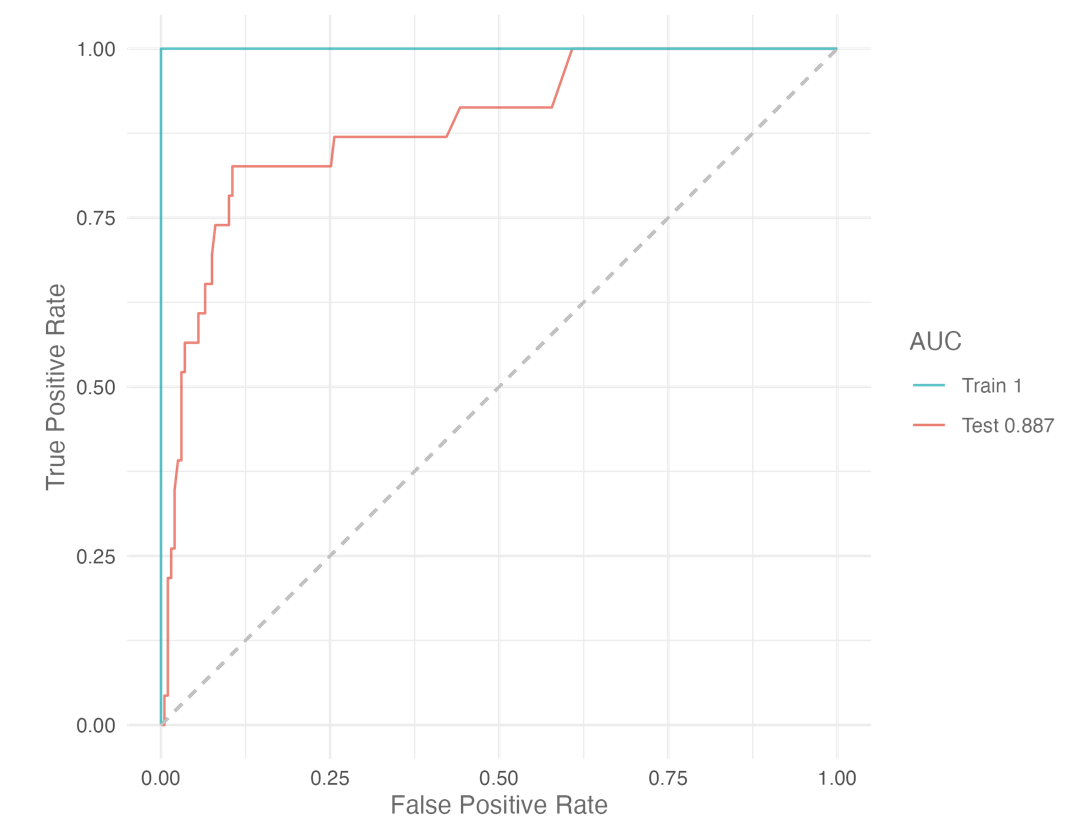


Figure S3: ROC curve of Random Forest model for bat-borne disease distribution

Table S5: Variable importance of Random Forest model for bat-borne disease distribution


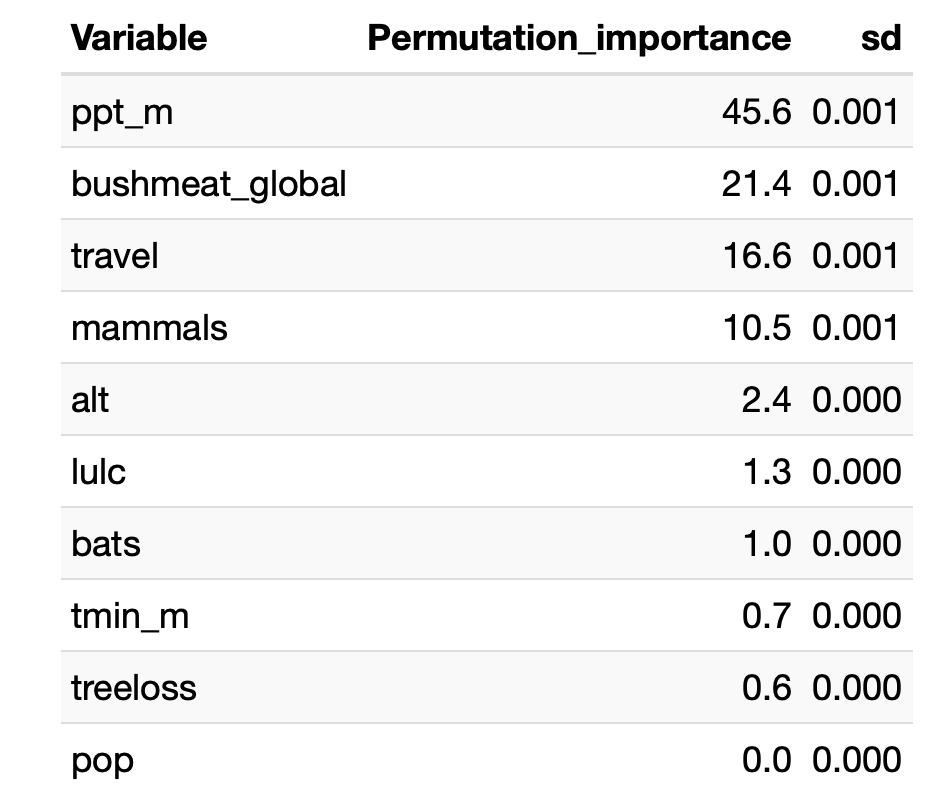


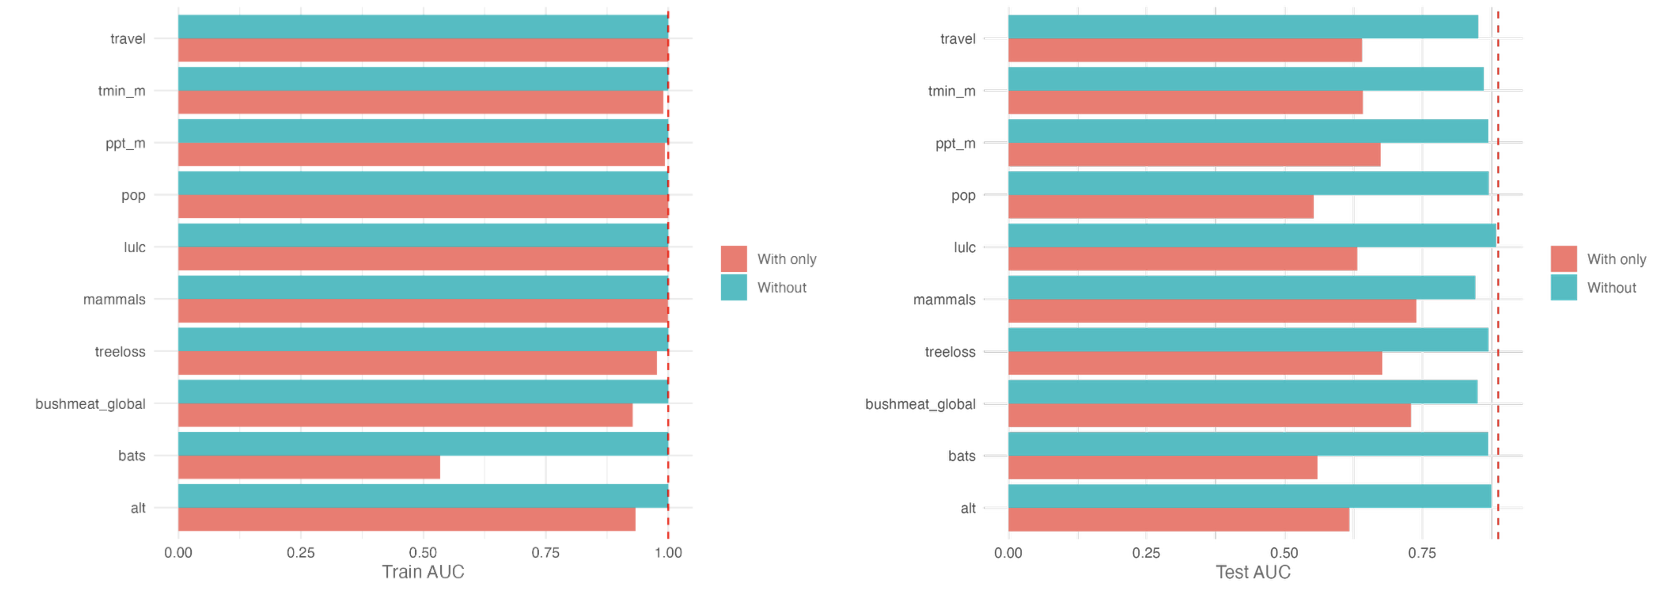


Figure S4: Jackknife test of Random Forest model for bat-borne disease distribution


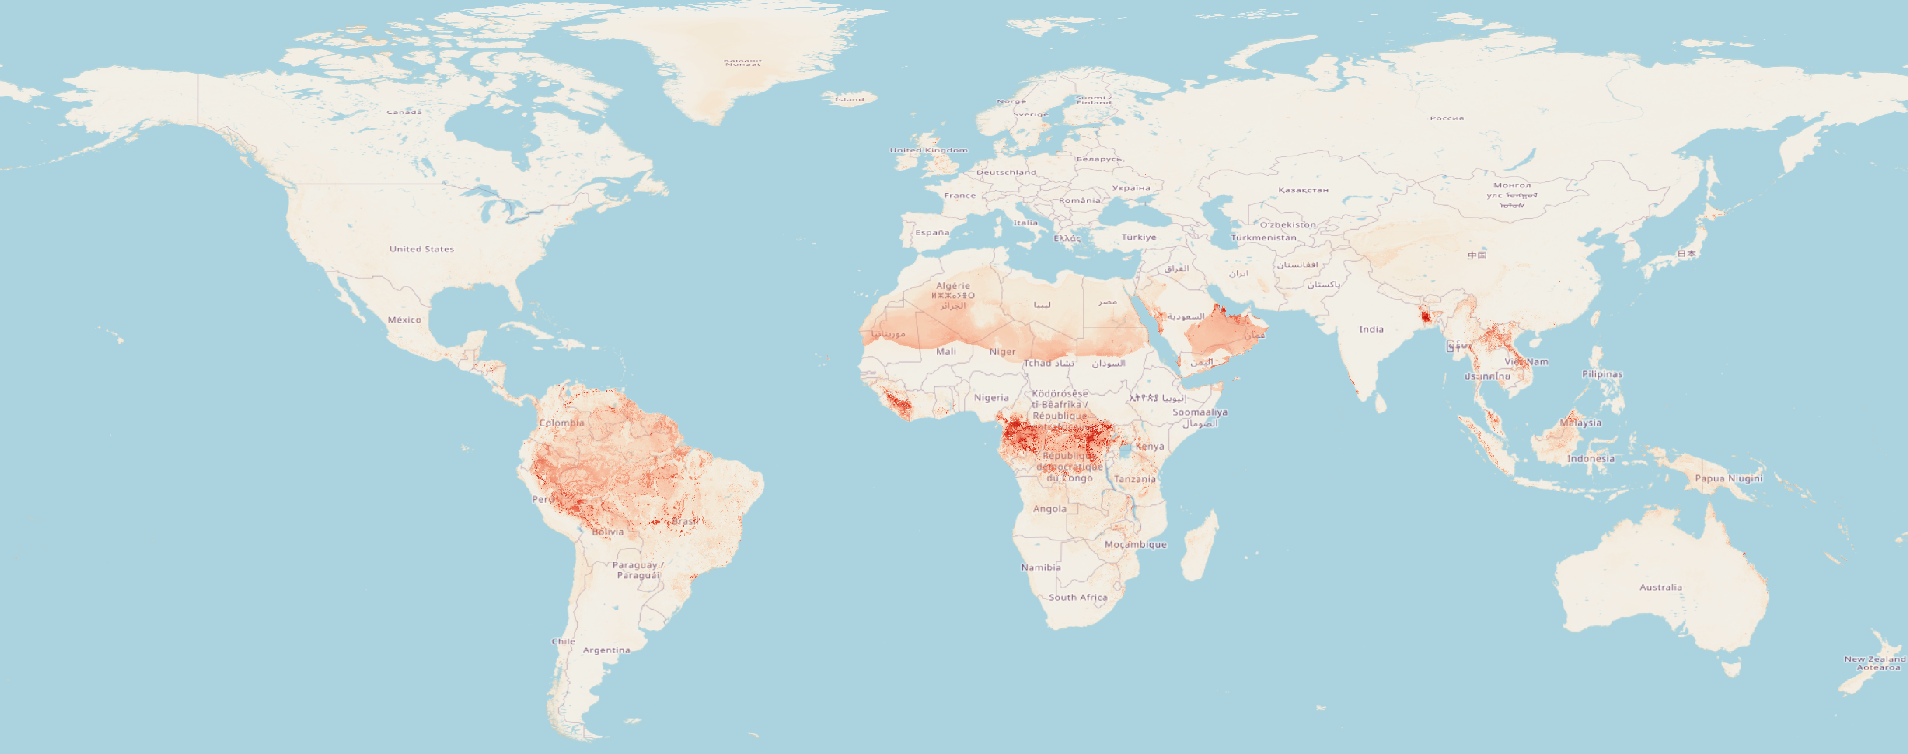


Figure S5: Prediction of distribution of bat-borne disease using the RF model

BRT – Bat borne diseases

For BRT, the tunable parameters are: distribution, n.trees (maximum number of grown trees), interaction depth, shrinkage, bag fraction. We set the distribution to “bernolli,” bag fraction = 0.5, shrinkage = 1, and interaction depth = 1. We used grid search to tune, n.trees and interaction depth. Final BRT model parameters: n.trees = 1000, learning.rate = 0.0025, bag.fraction = 0.5


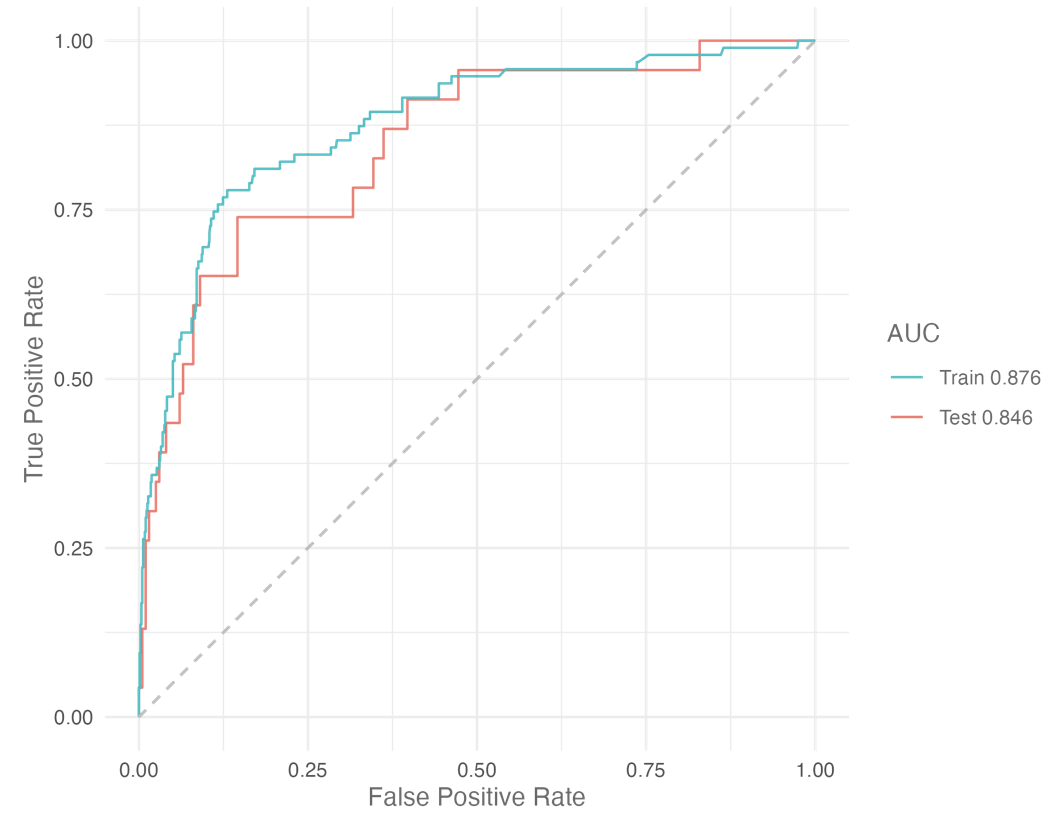


Figure S6: ROC curve of BRT model for bat-borne disease distribution

Table S6: Variable importance of BRT model for bat-borne disease distribution


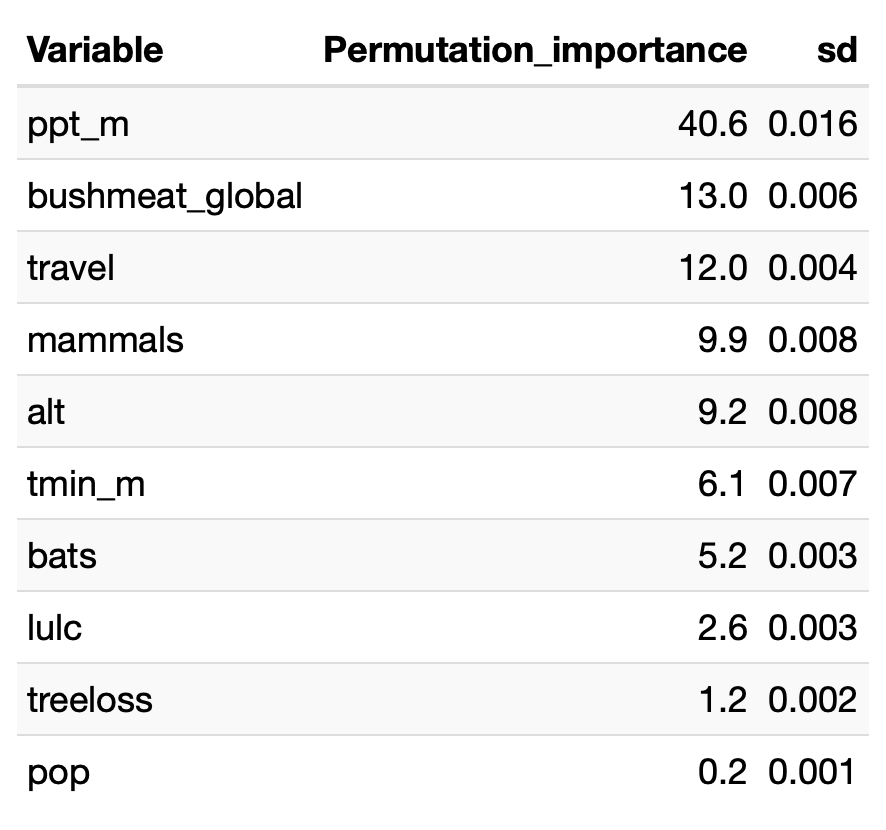


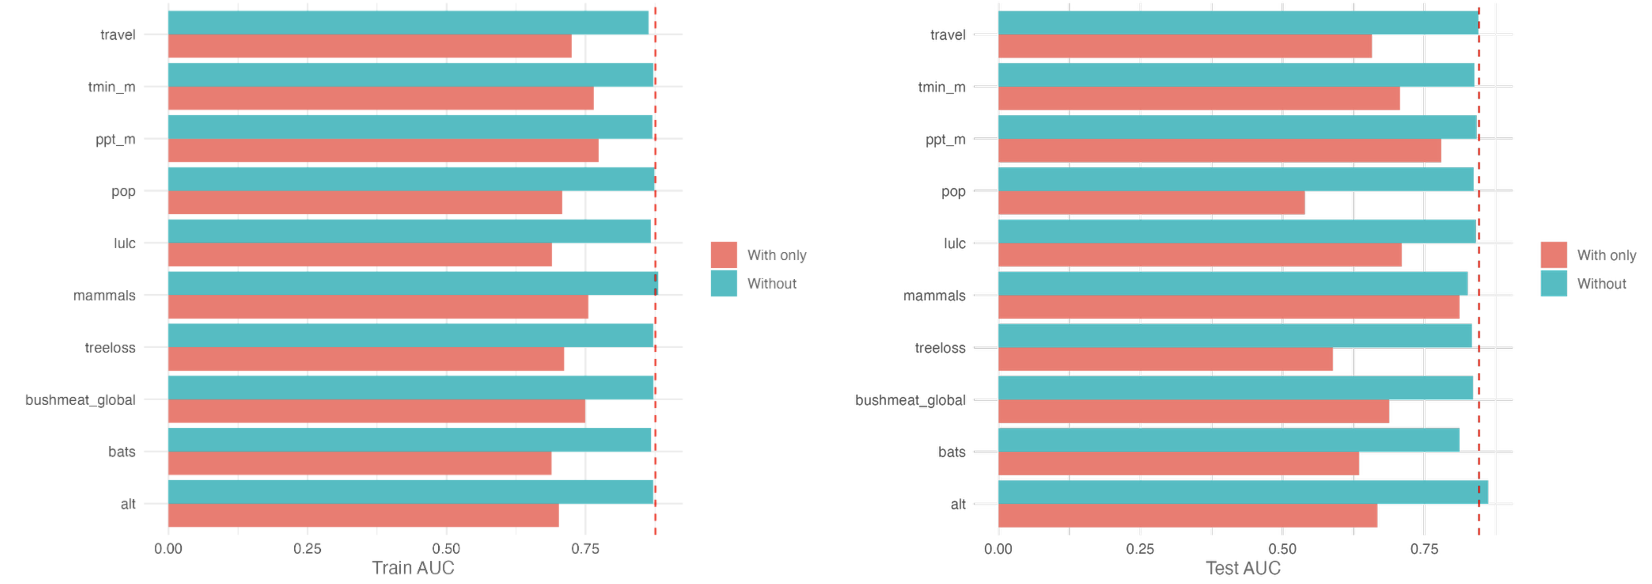


Figure S7: Jackknife test of BRT model for bat-borne disease distribution


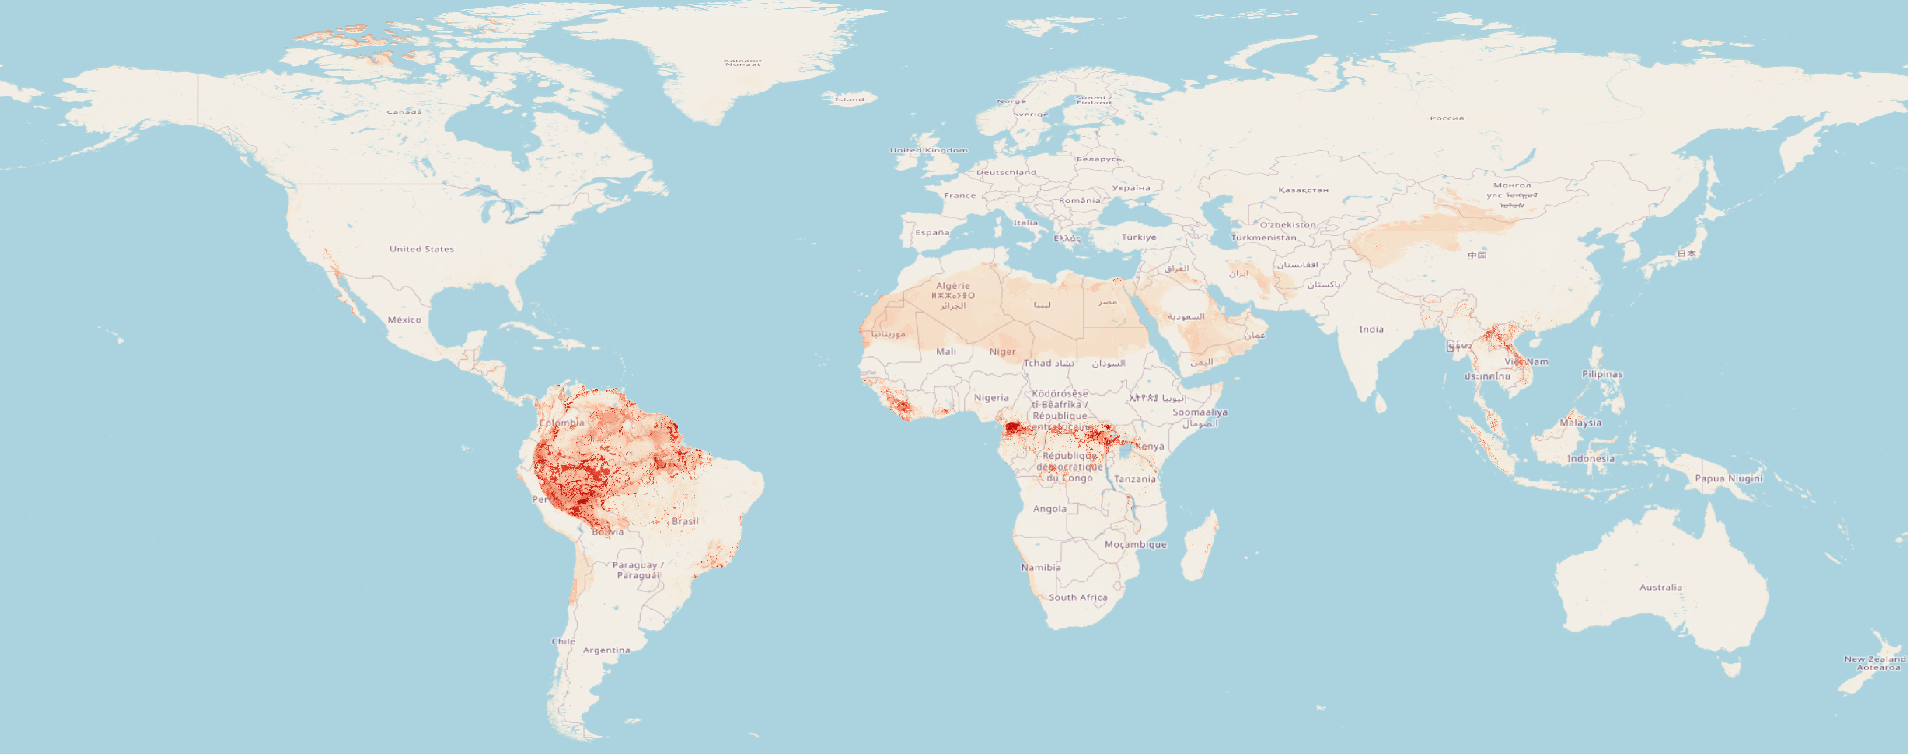


Figure S8: Prediction of distribution of bat-borne disease using the BRT model

### Differences in distribution of bat-borne diseases between the RF an BRT

The RF model captured high-risk regions in Bangladesh and in the Central and West Africa while the BRT model predictions were focused on South America and Central Africa.

Bayesian Binomial – Bat borne diseases

Iterations = 2001:3996

Thinning interval = 5

Number of chains = 2

Sample size per chain = 400

Quantiles for each variable:

2.5% 25% 50% 75%

beta.(Intercept) -2.757490 -2.59082 -2.50903 -2.416903

beta.alt -0.253628 -0.08889 0.01932 0.109514

beta.bats -0.003462 0.19764 0.30176 0.396957

beta.bushmeat_global 0.284322 0.39124 0.45114 0.514646

beta.treeloss -0.162908 -0.03116 0.03564 0.103352

beta.mammals -0.289591 -0.04824 0.06372 0.177562

beta.lulc -0.351827 -0.17944 -0.08514 0.008124

beta.pop -0.515170 -0.26097 -0.15006 -0.049284

beta.ppt_m -0.062630 0.10744 0.18535 0.265916

beta.tmin_m 0.020274 0.21716 0.33086 0.469977

beta.travel -0.244198 -0.04503 0.04151 0.123064

Deviance 647.379481 651.16621 654.37431 657.699578

97.5%

beta.(Intercept) -2.2498

beta.alt 0.3247

beta.bats 0.6001

beta.bushmeat_global 0.6237

beta.treeloss 0.2188

beta.mammals 0.3712

beta.lulc 0.1649

beta.pop 0.1161

beta.ppt_m 0.4159

beta.tmin_m 0.7214

beta.travel 0.2596

Deviance 665.9078


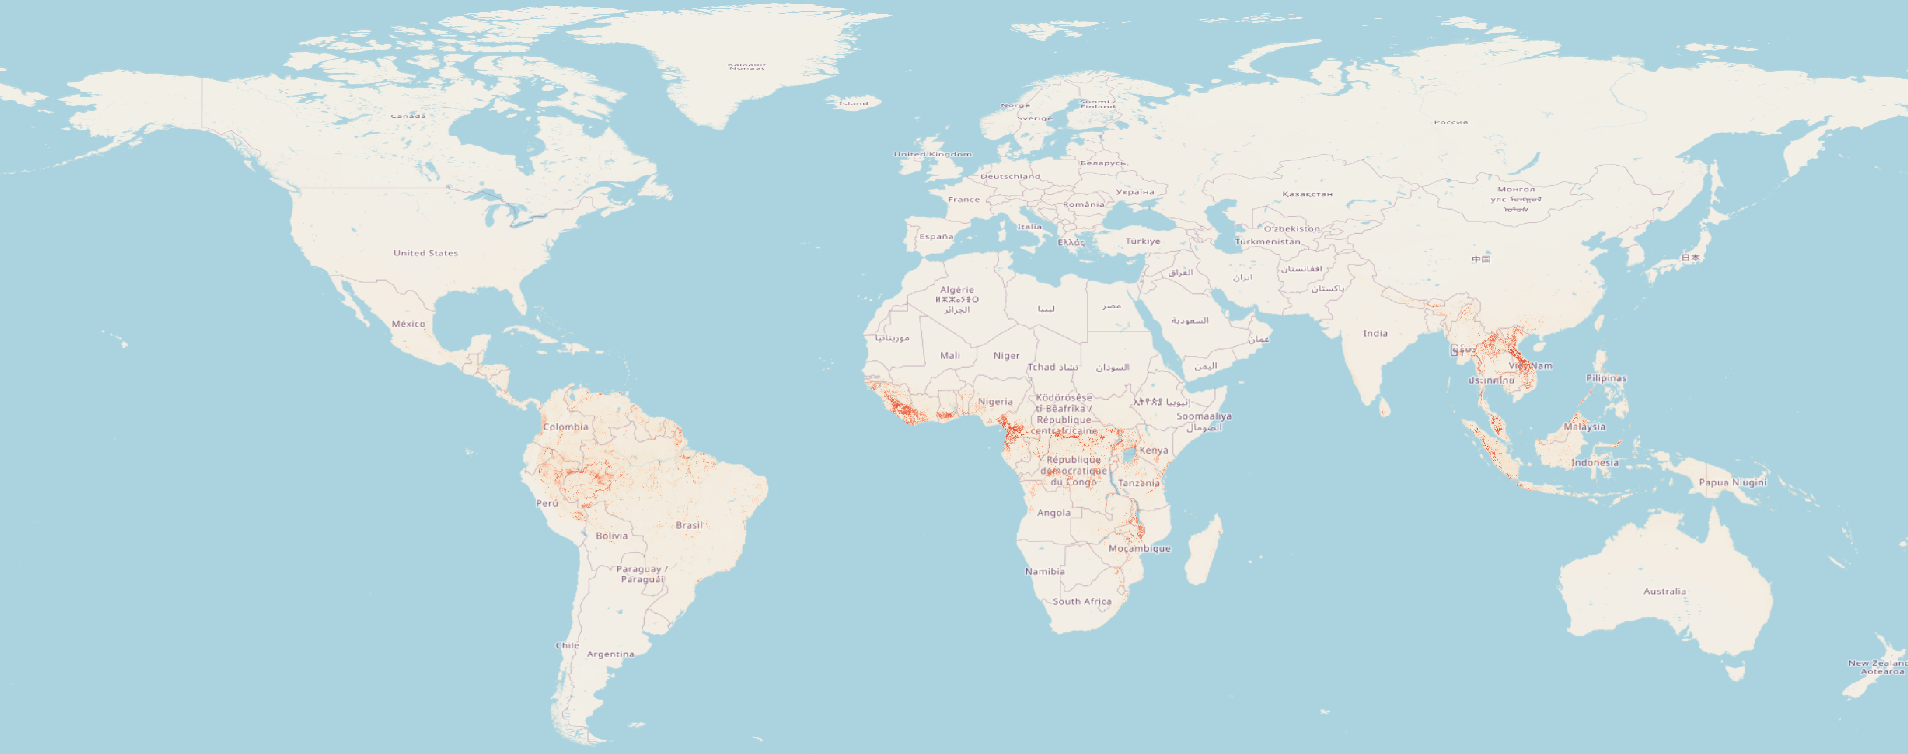


Figure S9: Prediction of distribution of bat-borne disease using the Bayesian Binomial model

Random Forest -Rodent borne diseases.

For model optimization using hyperparameter tuning, we used Random search using different combinations of tunable parameters. For RF, the tunable parameters (hyperameters) are:

mtry (number of variables randomly sampled as candidates at each split), ntrees (number of trees to grow), and node size. The parameters were later confirmed using individual grid searches.

Random Search: Node Size and ntrees

We tested the combination of node sizes (1–10) and ntrees up to 500 and evaluated the model performance using using AUC and TSS for a single hyperparameter. The final model parameters: ntree = 500, nodesize = 10, mtry = 2.


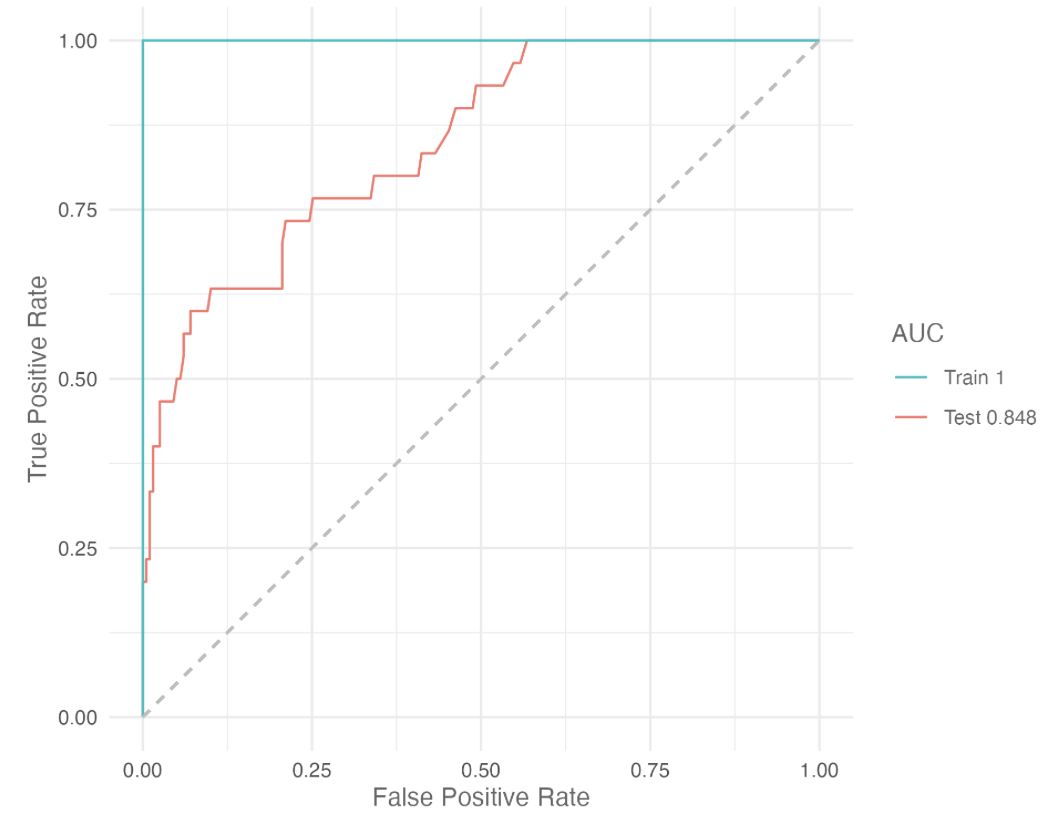


Figure S10: ROC curve of RF model for rodent-borne disease distribution

Table S7: Variable importance of RF model for rodent-borne disease distribution


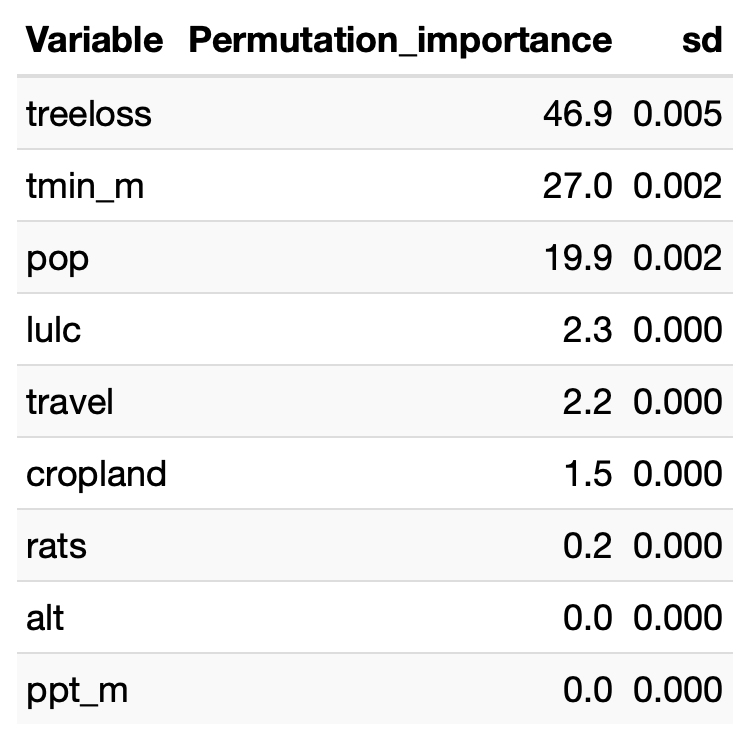


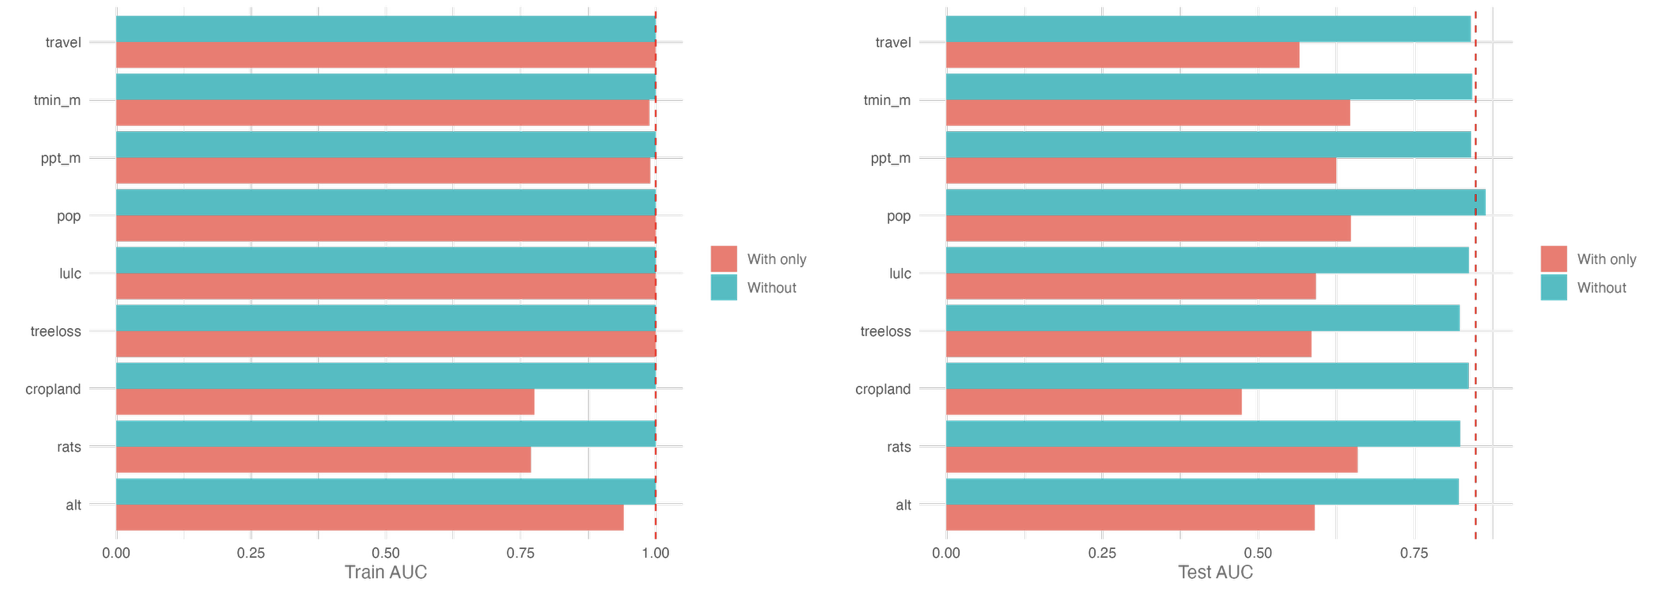


Figure S11: Jackknife test of RF model for rodent-borne disease distribution

Figure S12: Prediction of distribution of rodent-borne disease using the RF model


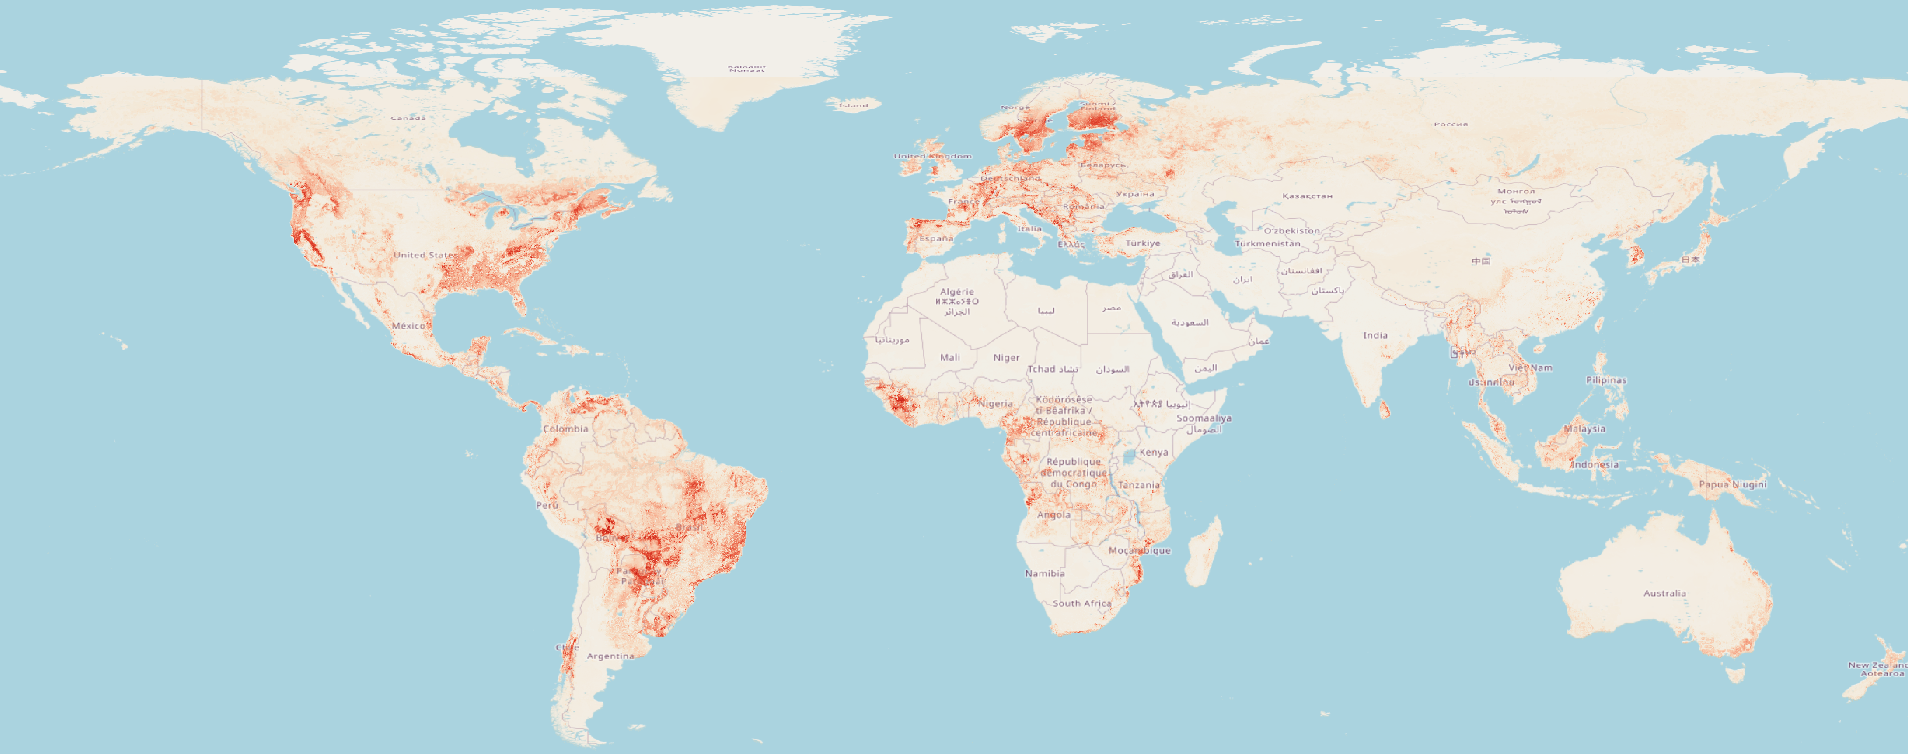


BRT – Rodent borne diseases

For BRT, the tunable parameters are: distribution, n.trees (maximum number of grown trees), interaction depth, shrinkage, bag fraction. We set the distribution to “bernolli,” bag fraction = 0.5, shrinkage = 1, and interaction depth = 1. We used grid search to tune, n.trees and interaction depth. Final BRT model parameters: n.trees = 500, learning.rate = 0.05, bag.fraction = 0.5


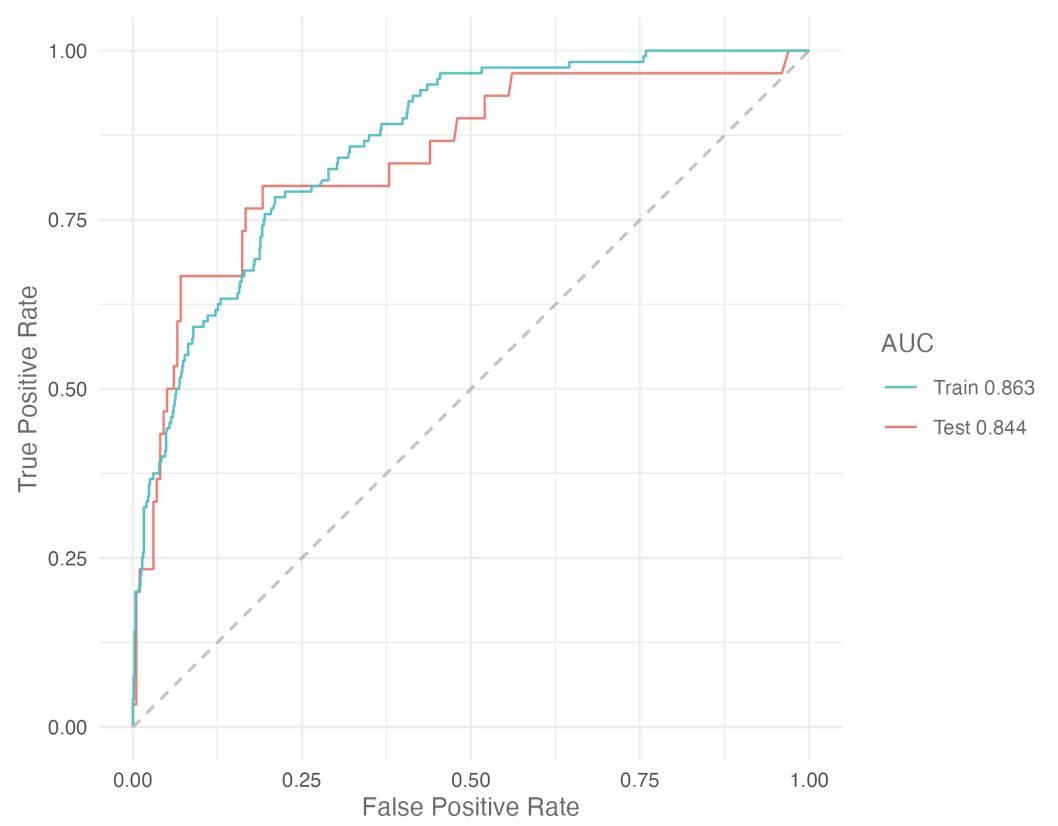


Figure S13: ROC curve of BRT model for rodent-borne disease distribution

Table S8: Variable importance of BRT model for rodent-borne disease distribution


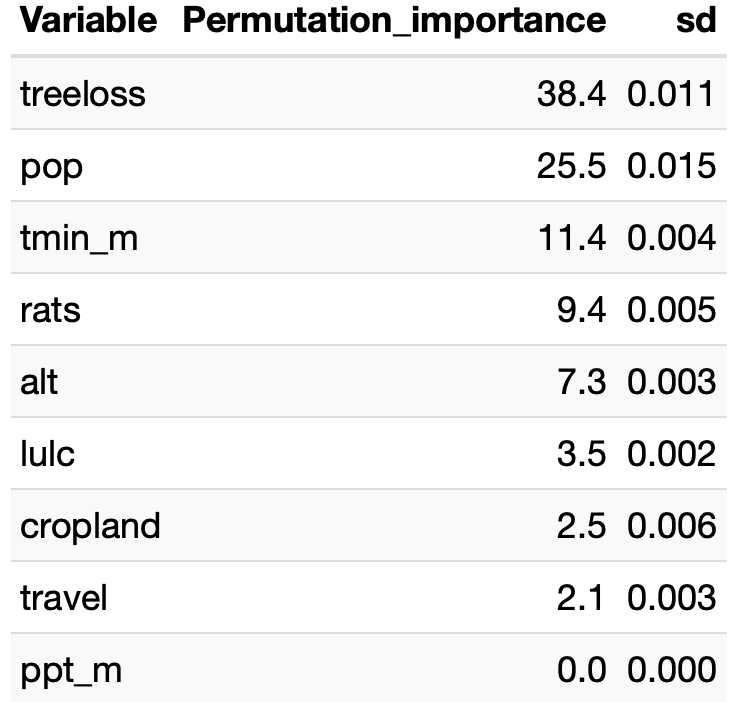


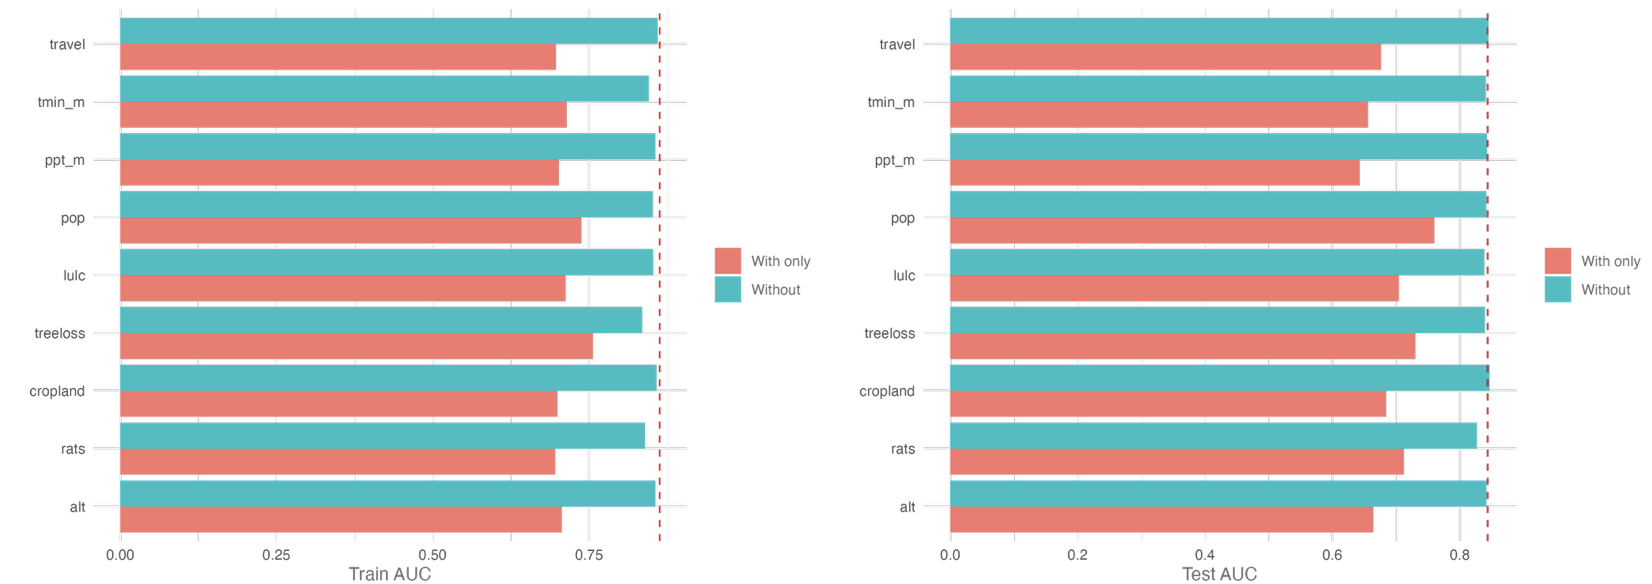


Figure S14: Jackknife test of BRT model for rodent-borne disease distribution


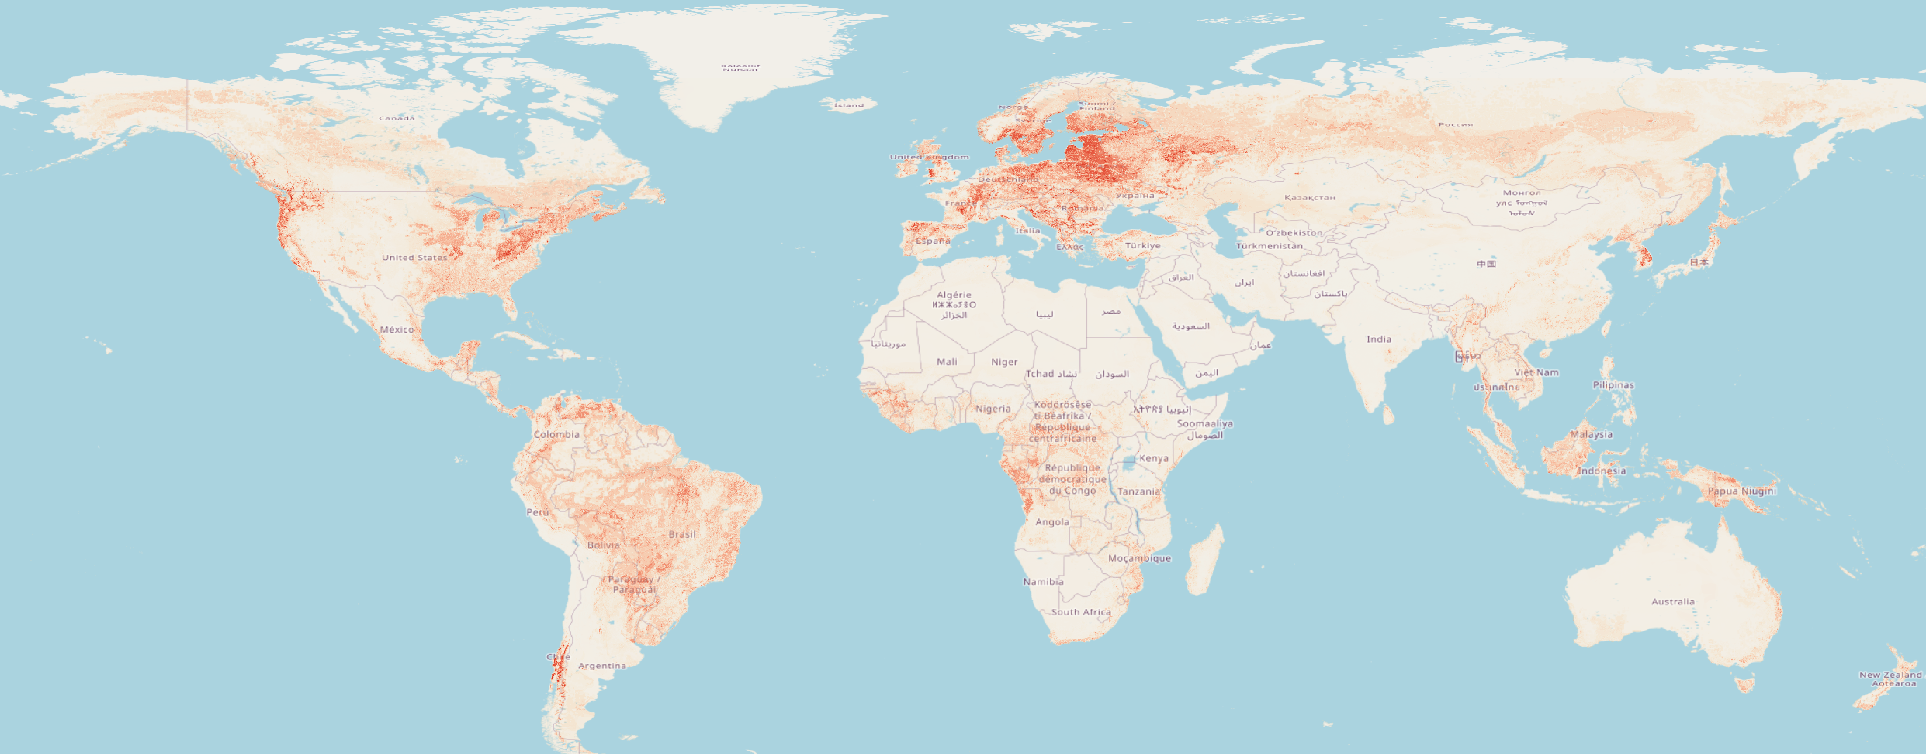


Figure S15: Prediction of distribution of rodent-borne disease using the BRT model

### Differences in distribution of rodent-borne diseases between the RF an BRT

The RF model captured high-risk regions in the Americas and Europe while the BRT model predictions were focused on Europe.

Bayesian Binomial – Rodent borne diseases

Iterations = 2001:3996

Thinning interval = 5

Number of chains = 2

Sample size per chain = 400

Quantiles for each variable:

2.5% 25% 50% 75%

beta.(Intercept) -3.00389 -2.71456 -2.59205 -2.46629

beta.alt -0.87093 -0.67197 -0.57837 -0.49187

beta.rats 0.11129 0.24261 0.31706 0.38745

beta.cropland -0.83708 -0.63325 -0.53307 -0.42997

beta.treeloss -0.11804 -0.02222 0.03557 0.09272

beta.lulc -0.51165 -0.34405 -0.25862 -0.16963

beta.pop -2.36203 -1.57542 -1.24568 -0.96637

beta.ppt_m -0.08958 0.07109 0.14730 0.23279

beta.tmin_m -0.59486 -0.44664 -0.37373 -0.30317

beta.travel -1.67003 -1.03273 -0.80737 -0.59888

Deviance 765.85719 769.38261 772.06842 775.40319

97.5%

beta.(Intercept) -2.26676

beta.alt -0.32740

beta.rats 0.53488

beta.cropland -0.25070

beta.treeloss 0.20475

beta.lulc -0.01181

beta.pop -0.44684

beta.ppt_m 0.38807

beta.tmin_m -0.17013

beta.travel -0.27786

Deviance 783.24622


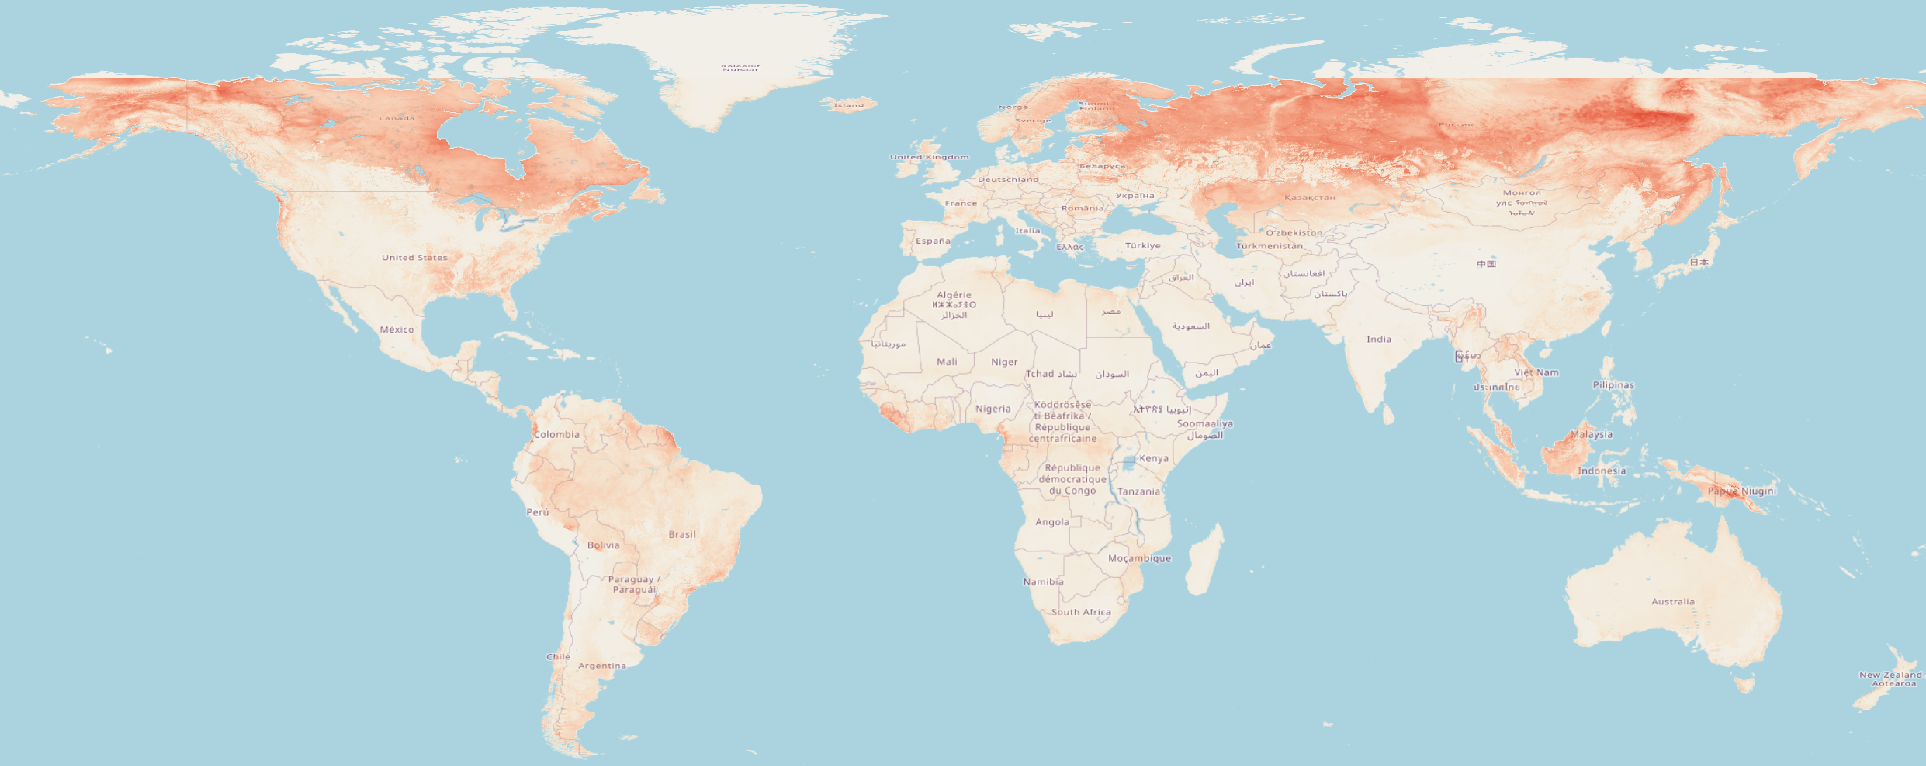


Figure S16: Prediction of distribution of rodent-borne disease using the Bayesian Binomial model

## Ensemble modeling

In the final ensemble model for the distribution of bat- and rodent-borne activities, the metacovariates (RF, BRT, and Bayesian Binomial) were statistically significant and relevant to the final distributions.

The MCMC trace and density plots for binomial model in a hierarchical Bayesian framework with spatial autocorrelation (rho) with 4,000 iterations and 2 chains (2,000 per chain). We used non-informative priors with a large variance except for the spatial random effects, for which a uniform (min = 0, max = 10) weak informative prior was used for the parameter inference.

Except for rho, the chains of the other parameters show convergence with regular density plots. While spatial autocorrelation parameter shows some areas of non-convergence with a slight irregularity in the density distribution, which is expected in the autocorrelation parameter. This is confirmed with the Gelman-Rubin’s convergence metric. Overall, the Gelman-Rubin’s convergence diagnostic is 1.1 for the key parameters, thereby confirming convergence and the validity of the model.

The intrinsic conditional autoregressive model (iCAR) was calculated using:

pi = Normal (ui, Vp/ni)

Where *ui* = mean of *pi* in the neighborhood of cell *i*; *Vp* = variance of the spatial random effects; *ni* = number of neighbors for cell *i*. The iCAR used a spatial structure of the eight nearest neighboring pixels (Queen approach) to account for spatial correlation

Ensemble model : Binomial icar bat-borne disease model


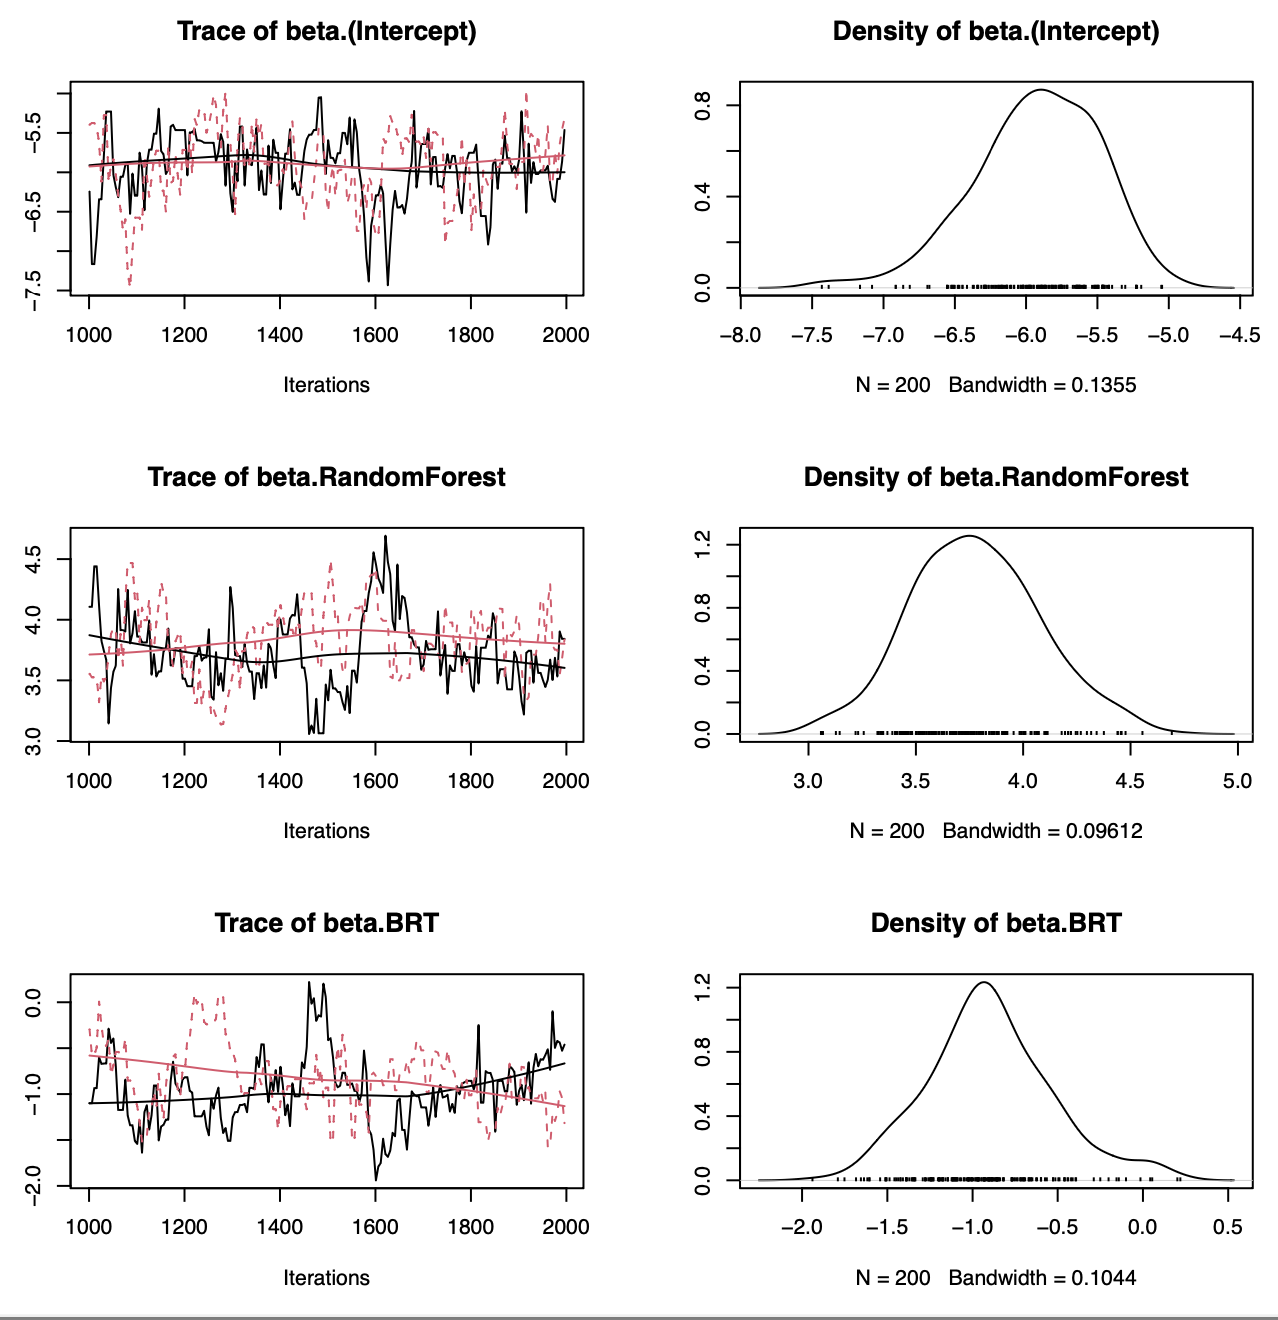


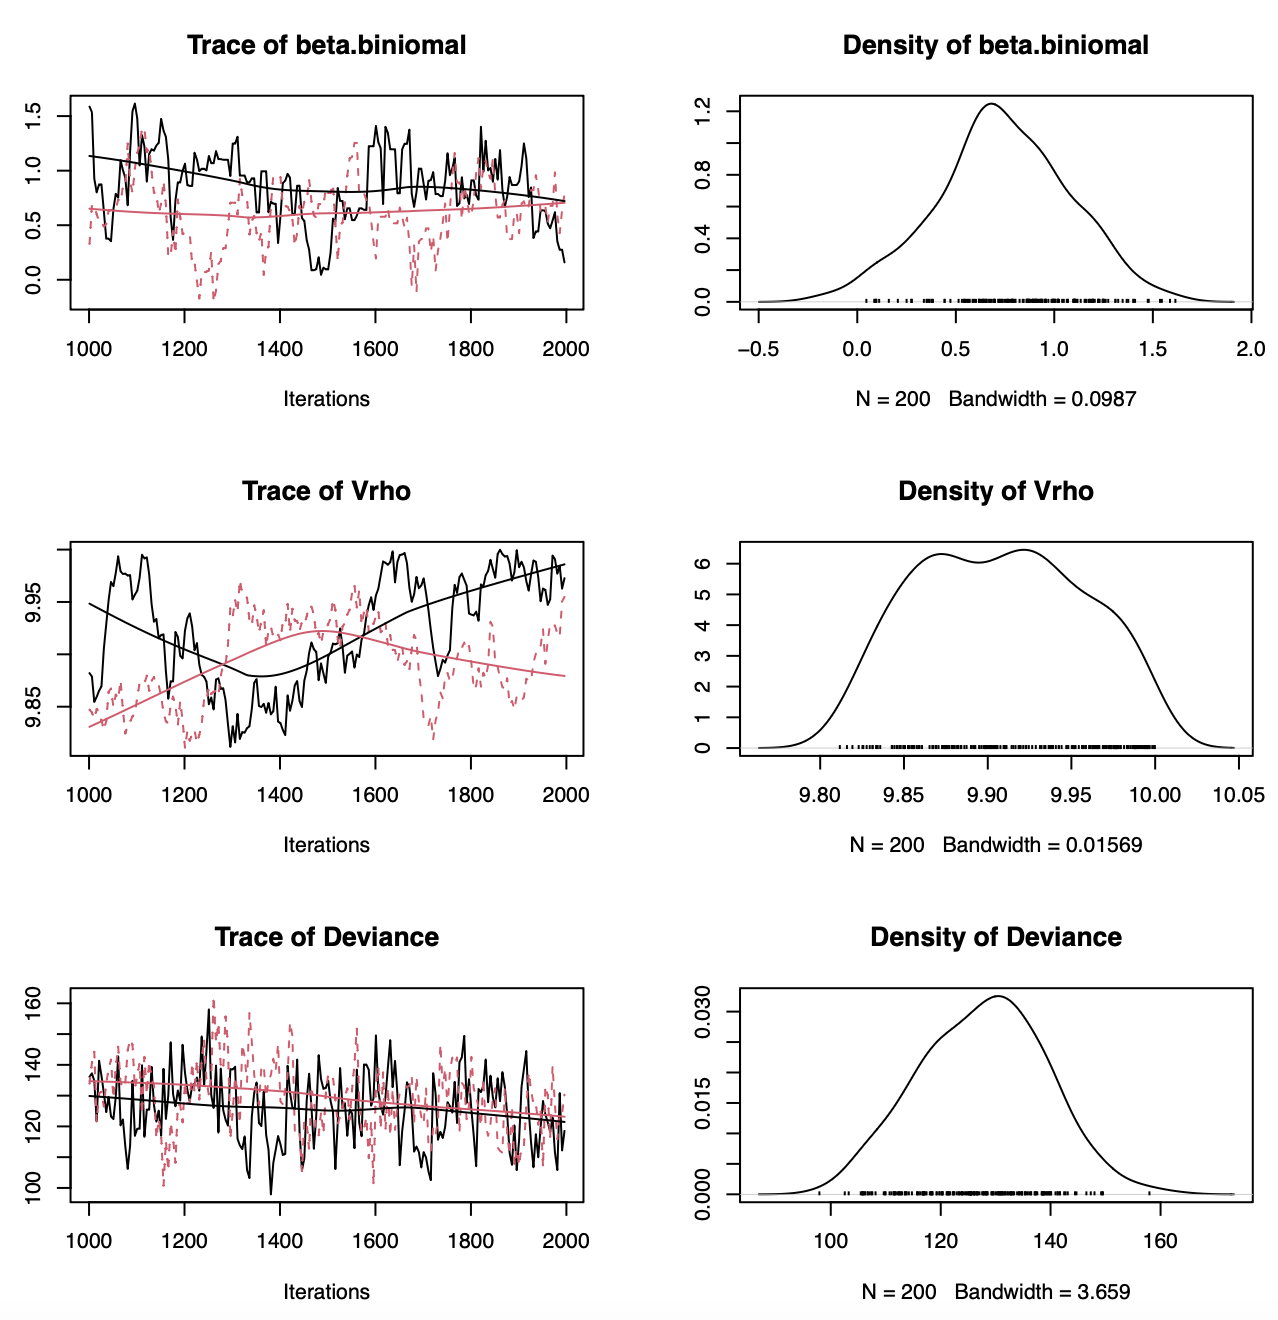


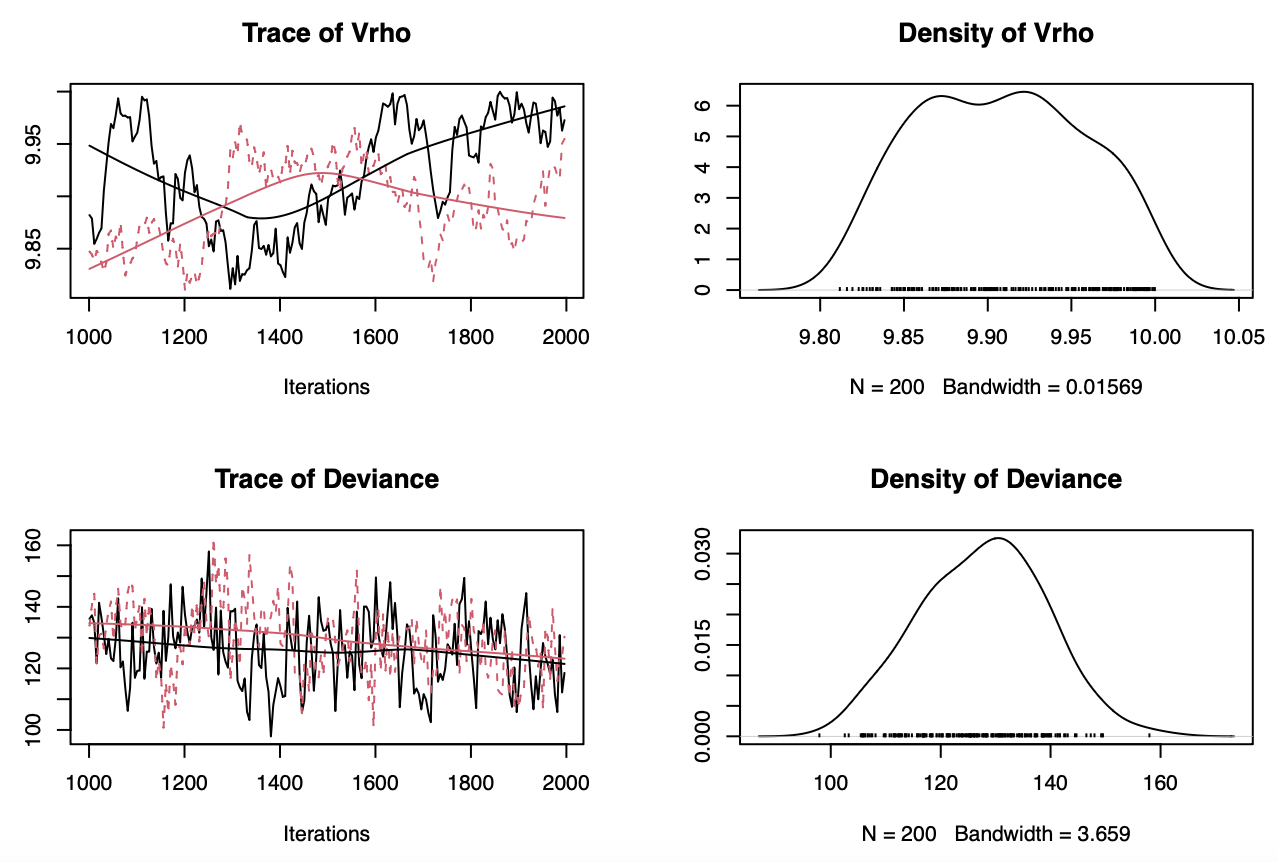


Figure S17: Binomial icar MCMC trace of bat-borne disease model


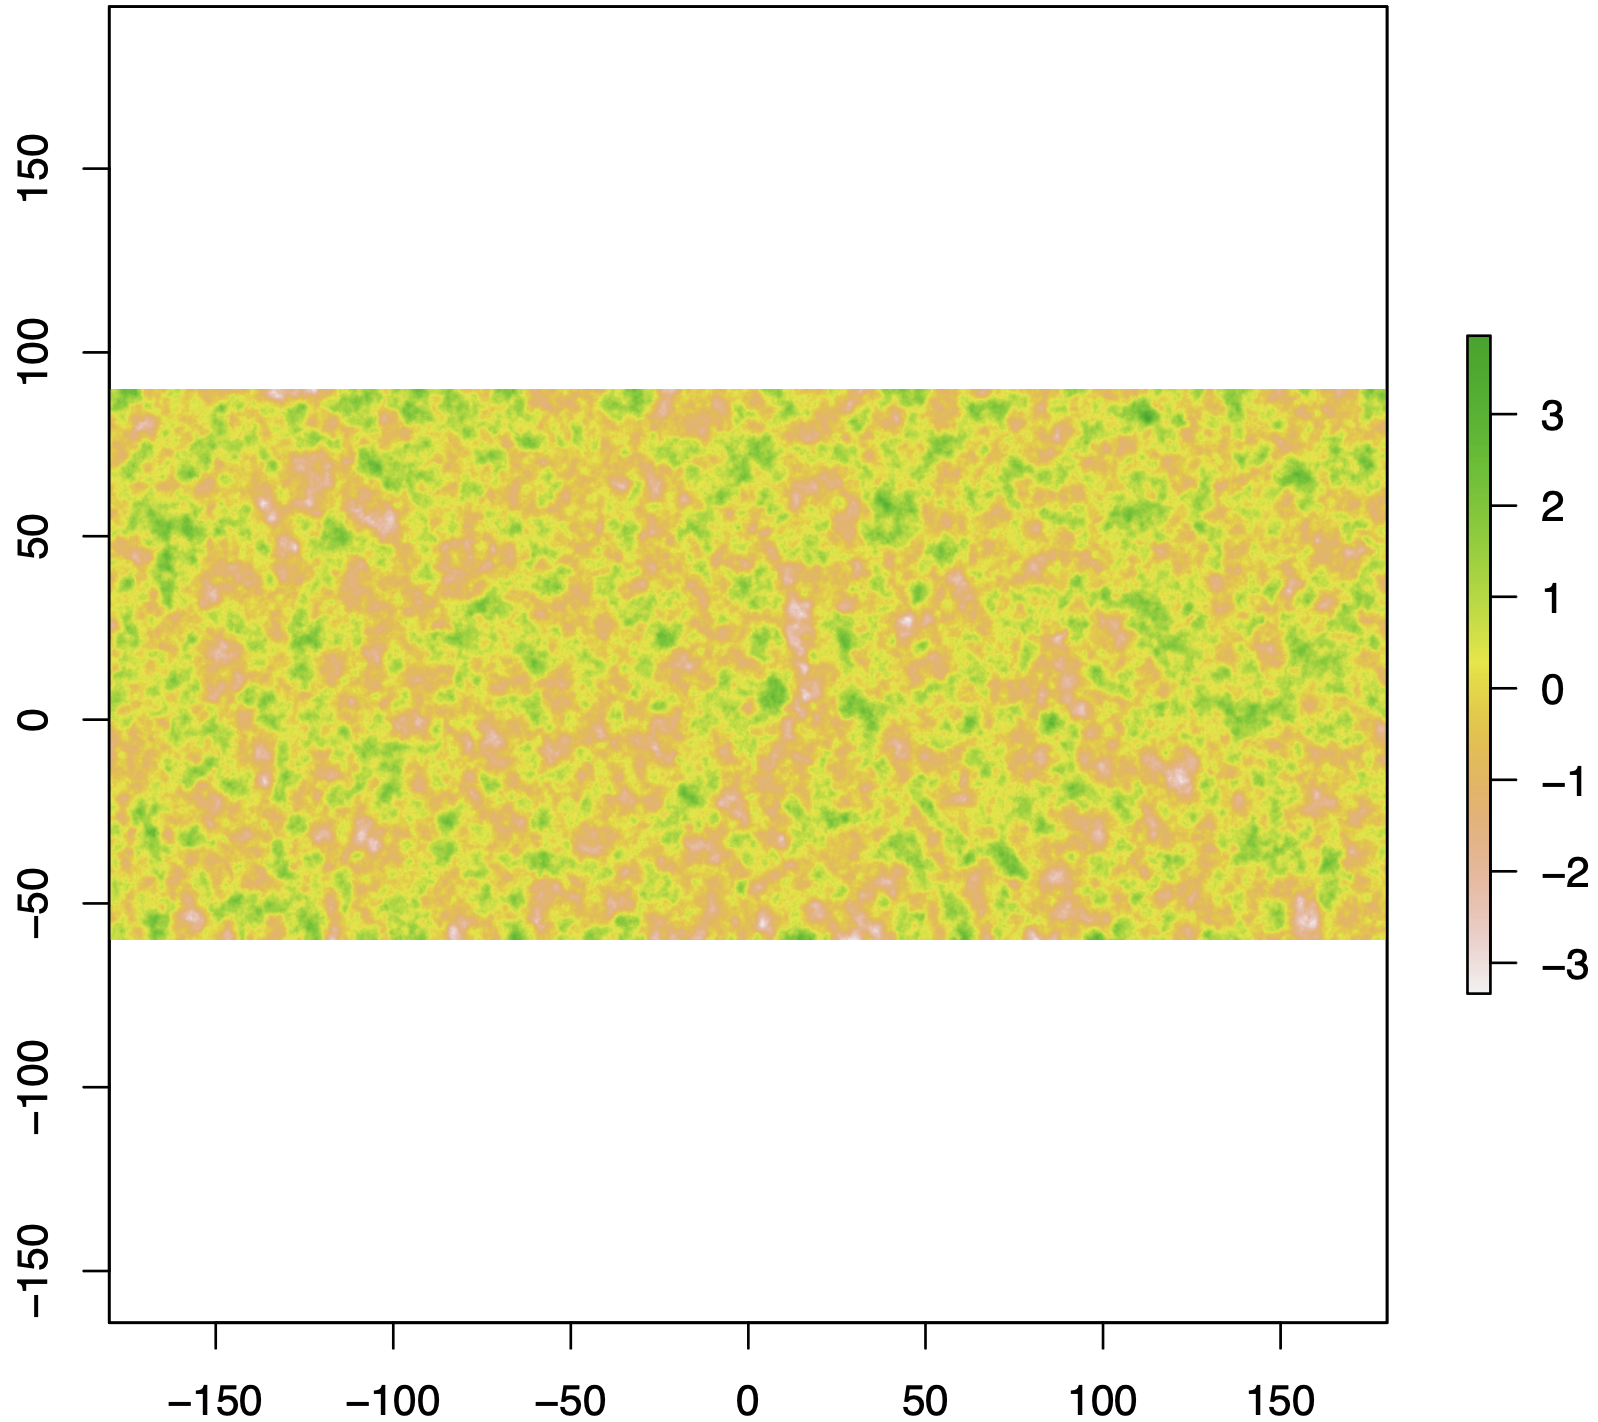


Figure S18: Binomial icar bat-borne disease model- Random effects

Table S9: The highest mean probabilities for bat-borne diseases with the Standard Deviation (SD), Minimum (min) and Maximum (Max) by country.

| Country | Continent | Mean | SD | Min | Max |
| --- | --- | --- | --- | --- | --- |
| Bahrain | Asia | 0.82 | 0.07 | 0.73 | 0.92 |
| Equatorial Guinea | Africa | 0.76 | 0.28 | 0.05 | 0.99 |
| Gabon | Africa | 0.56 | 0.27 | 0.01 | 0.99 |
| Liberia | Africa | 0.56 | 0.30 | 0.01 | 0.99 |
| Congo | Africa | 0.44 | 0.31 | 0 | 0.99 |
| Sierra Leone | Africa | 0.41 | 0.37 | 0 | 0.99 |
| Lao People's Democratic Republic | Asia | 0.35 | 0.28 | 0 | 0.96 |
| Cameroon | Africa | 0.34 | 0.35 | 0 | 0.99 |
| Malaysia | Asia | 0.33 | 0.28 | 0 | 0.99 |
| Uganda | Africa | 0.31 | 0.30 | 0 | 0.99 |
| Qatar | Asia | 0.29 | 0.24 | 0 | 0.98 |
| Democratic Republic of the Congo | Africa | 0.29 | 0.27 | 0 | 0.99 |

Ensemble model : Binomial icar rodent-borne disease model


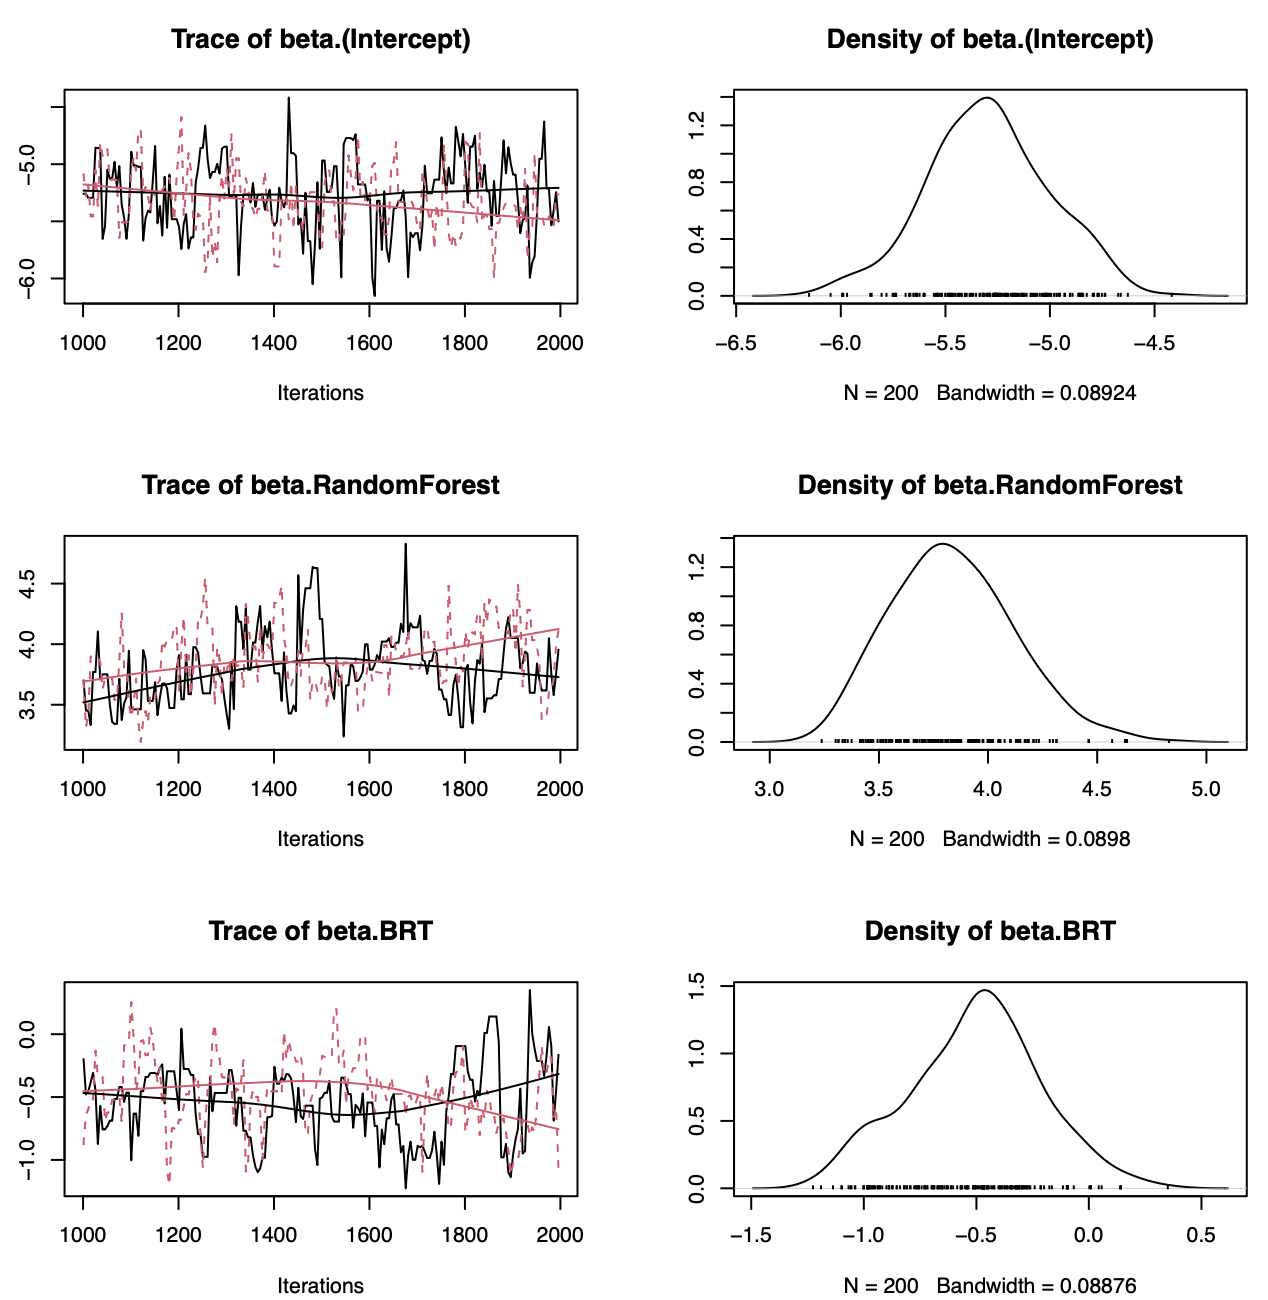


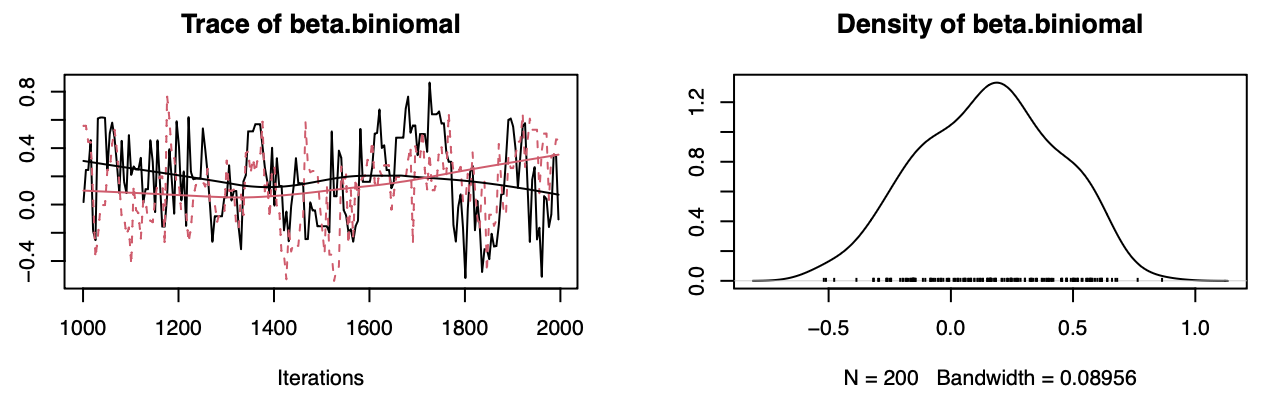


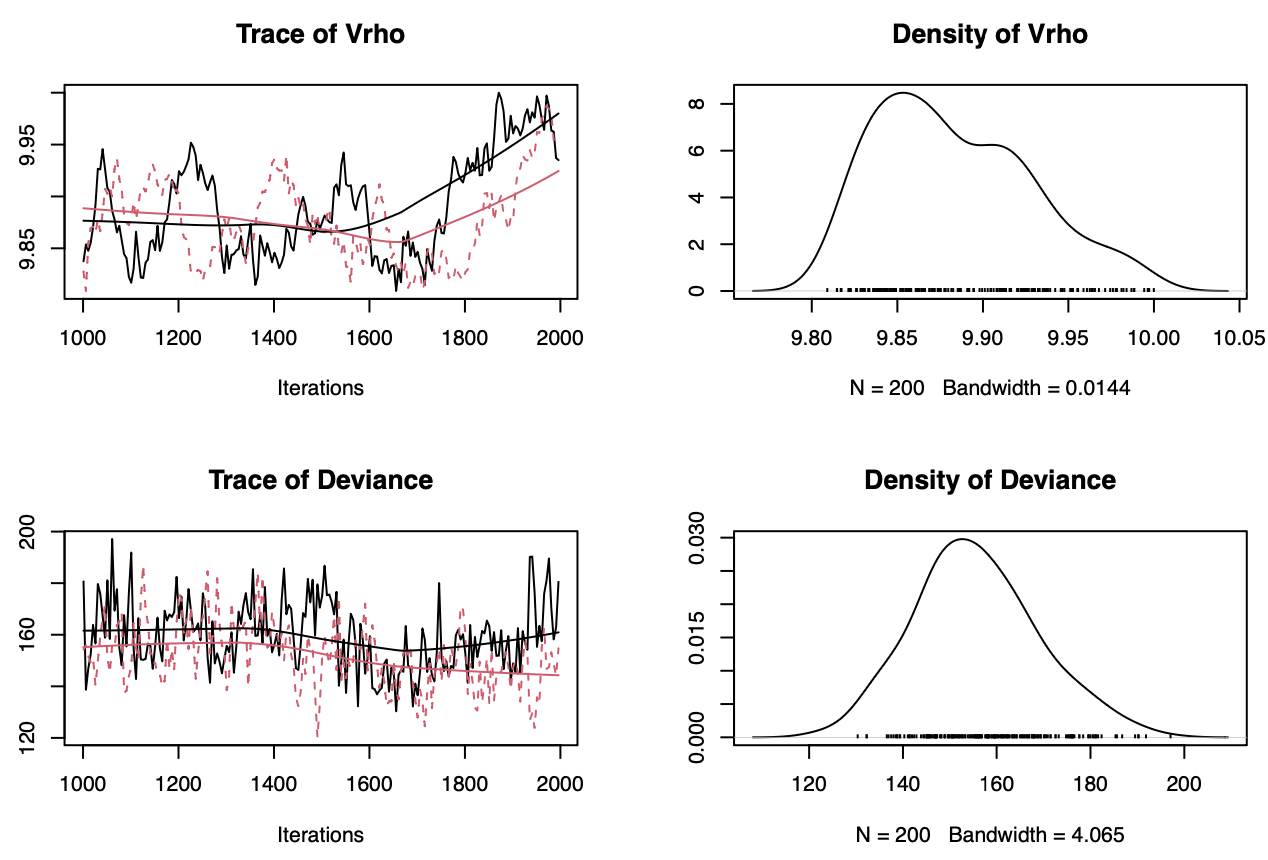


Figure S19: Binomial icar MCMC trace of rodent-borne disease model

Figure S20: Binomial icar rodent-borne disease model- Random effects


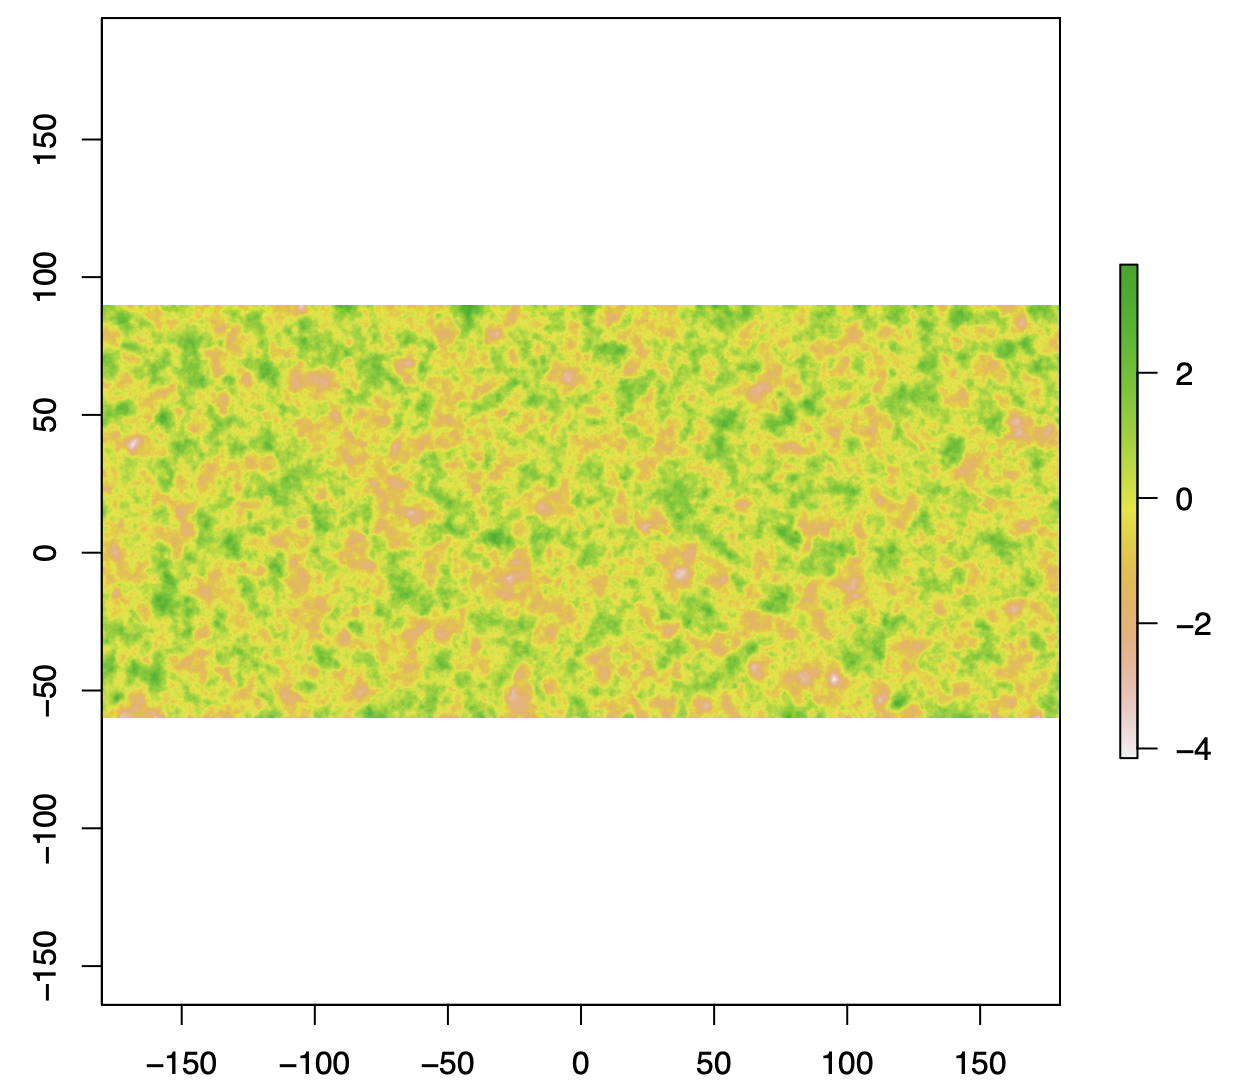


Table S10: The highest mean probabilities for rodent-borne diseases with the Standard Deviation (SD), Minimum (min) and Maximum (Max) by country.

| Country | Continent | Mean | SD | Min | Max |
| --- | --- | --- | --- | --- | --- |
| Montenegro | Europe | 0.49 | 0.29 | 0 | 0.96 |
| Sierra Leone | Africa | 0.40 | 0.33 | 0.01 | 0.99 |
| Liberia | Africa | 0.39 | 0.24 | 0.01 | 0.99 |
| Sri Lanka | Asia | 0.38 | 0.28 | 0.01 | 0.99 |
| Bosnia & Herzegovina | Europe | 0.36 | 0.23 | 0 | 0.99 |
| Guinea | Africa | 0.31 | 0.31 | 0 | 0.99 |
| Bolivia | Americas | 0.30 | 0.28 | 0 | 0.99 |
| Paraguay | Americas | 0.30 | 0.26 | 0 | 0.99 |
| Finland | Europe | 0.29 | 0.28 | 0 | 0.95 |
| Sweden | Europe | 0.24 | 0.28 | 0 | 0.97 |

## Simulation methods for improved reporting

Improved reporting refers to a hypothetical scenario where underreporting biases are reduced through enhanced surveillance, increased diagnostic capacity, and systematic data collection. In our simulations, this is modeled by adjusting reporting probabilities to better reflect potential disease presence in under-surveyed regions. We defined different levels of potential reporting improvements, where data collaboration, improved data quality or reporting frequency improves by 10%, 25%, and 50%. We decreased the values in the uncertainty raster by a fixed percentage (10%, 25%, and 50%) to simulate various scenarios of better reporting.

New Probability Range = Probability ± (1.96× Updated Uncertainty)

Using the updated uncertainty rasters, we calculated the new lower and upper confidence intervals (CI), to then calculate the new probability of bat- and rodent- borne diseases with increased reporting. We re-ran the ensemble modelling with the new probability raster as one of the meta-covariates (along with the RF, BRT and Bayesian Binomial raster). We compared the new maxTSS of the new ensemble with the original model.

The assumption that uncertainty is reduced with improved reporting is based on the rationale that better reporting leads to more precise and accurate data, which in turn reduces spatial uncertainty in disease occurrence. By using exact coordinates and not generalized or centroid locations, we hope to reduce the underlying limitations. Nevertheless, uncertainty can persist due to factors such as clustering, imprecise location data, and reporting biases.

Table S11: The area of high-risk (km2) for bat-borne diseases calculated from the Ensemble model and the Ensemble model with 50% reduction in uncertainty in Europe.

| Name | Region | High-risk areas in Ensemble (km2) | High-risk areas in Ensemble50  (km2) |
| --- | --- | --- | --- |
| Albania | Southern Europe | 173 | 0 |
| Andorra | Southern Europe | 3 | 0 |
| Austria | Western Europe | 532 | 0 |
| Azores Islands | Southern Europe | 16 | 0 |
| Belarus | Eastern Europe | 1489 | 0 |
| Belgium | Western Europe | 327 | 0 |
| Bosnia & Herzegovina | Southern Europe | 170 | 0 |
| Bulgaria | Eastern Europe | 147 | 0 |
| Croatia | Southern Europe | 422 | 0 |
| Czech Republic | Eastern Europe | 386 | 0 |
| Denmark | Northern Europe | 1354 | 0 |
| Estonia | Northern Europe | 1464 | 0 |
| Faroe Islands | Northern Europe | 207 | 0 |
| Finland | Northern Europe | 5447 | 100 |
| France | Western Europe | 6466 | 100 |
| Germany | Western Europe | 1980 | 0 |
| Gibraltar | Southern Europe | 0 | 0 |
| Greece | Southern Europe | 947 | 0 |
| Guernsey | Northern Europe | 1 | 0 |
| Holy See | Southern Europe | 0 | 0 |
| Hungary | Eastern Europe | 790 | 0 |
| Iceland | Northern Europe | 3067 | 0 |
| Ireland | Northern Europe | 2776 | 0 |
| Isle of Man | Northern Europe | 45 | 0 |
| Italy | Southern Europe | 1759 | 0 |
| Jersey | Northern Europe | 2 | 0 |
| Latvia | Northern Europe | 1533 | 0 |
| Liechtenstein | Western Europe | 1 | 0 |
| Lithuania | Northern Europe | 638 | 0 |
| Luxembourg | Western Europe | 118 | 0 |
| Madeira Islands | Southern Europe | 2 | 0 |
| Malta | Southern Europe | 1 | 0 |
| Moldova, | Eastern Europe | 23 | 0 |
| Monaco | Western Europe | 0 | 0 |
| Montenegro | Southern Europe | 45 | 0 |
| Netherlands | Western Europe | 697 | 0 |
| Norway | Northern Europe | 5826 | 0 |
| Poland | Eastern Europe | 4047 | 0 |
| Portugal | Southern Europe | 598 | 0 |
| Romania | Eastern Europe | 385 | 0 |
| Russian Federation | Eastern Europe | 107604 | 100 |
| San Marino | Southern Europe | 0 | 0 |
| Serbia | Southern Europe | 212 | 0 |
| Slovakia | Eastern Europe | 254 | 0 |
| Slovenia | Southern Europe | 97 | 0 |
| Spain | Southern Europe | 2665 | 0 |
| Svalbard and Jan Mayen Islands | Northern Europe | 685 | 0 |
| Sweden | Northern Europe | 7268 | 0 |
| Switzerland | Western Europe | 494 | 0 |
| The former Yugoslav Republic of Macedonia | Southern Europe | 49 | 0 |
| U.K. | Northern Europe | 30753 | 600 |
| Ukraine | Eastern Europe | 4160 | 0 |
| Total |  | 198125 | 900 |

Table 12: The area of high-risk (km2) for rodent-borne diseases calculated from the Ensemble model and the Ensemble model with 50% reduction in uncertainty in the Balkan countries.

| Name | Region | High-risk areas in Ensemble (km2) | High-risk areas in Ensemble50  (km2) |
| --- | --- | --- | --- |
| Albania | Southern Europe | 2100 | 7916 |
| Bosnia & Herzegovina | Southern Europe | 2800 | 17935 |
| Bulgaria | Eastern Europe | 0 | 5084 |
| Croatia | Southern Europe | 2100 | 14113 |
| Greece | Southern Europe | 600 | 14366 |
| Montenegro | Southern Europe | 3300 | 7440 |
| North Macedonia + Kosovo | Southern Europe | 0 | 1632 |
| Romania | Eastern Europe | 0 | 13811 |
| Serbia | Southern Europe | 2800 | 14995 |
| Slovenia | Southern Europe | 900 | 9029 |
| Total |  | 14600 | 106125 |


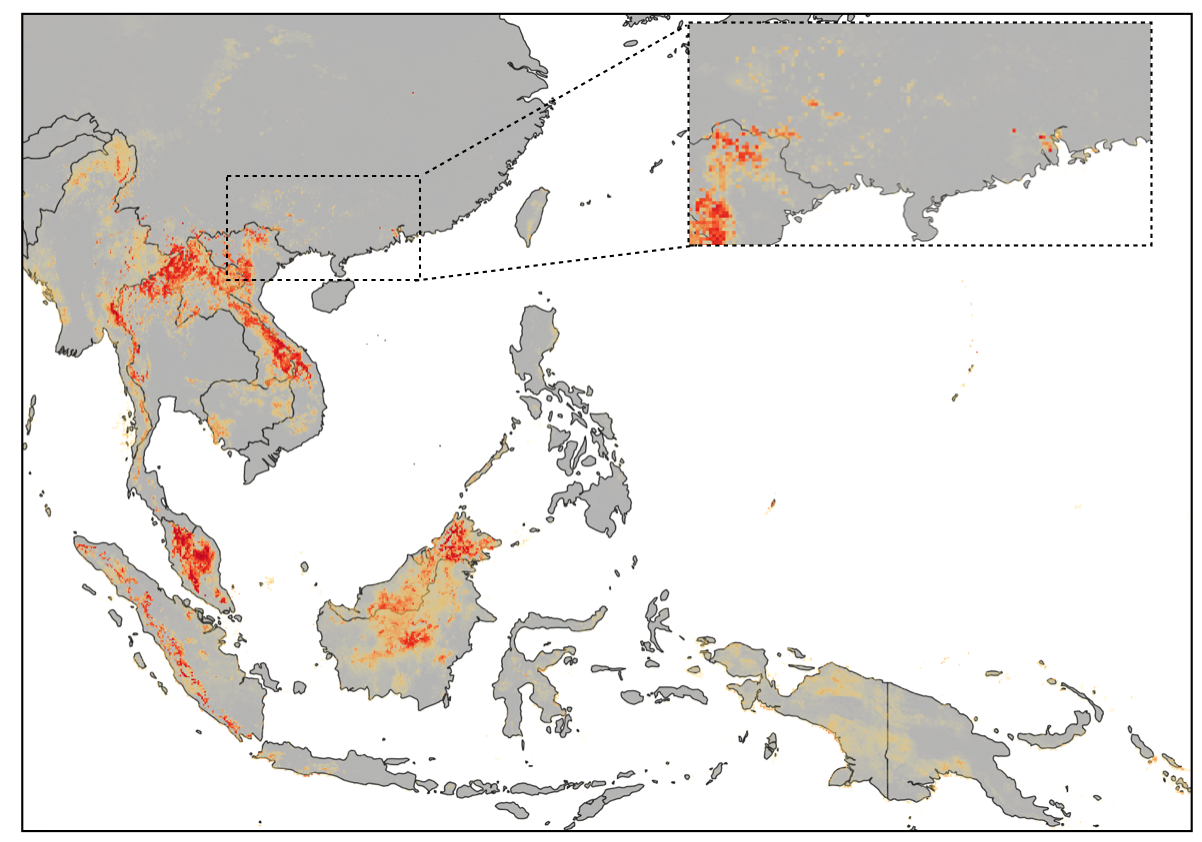


Figure S21: High-risk areas of bat-borne diseases in Southeast Asia and Southern China.

**Comparison of risk maps with outbreak patterns from historical data**

To further validate the predictive accuracy of our model, we have now compared our results with known outbreak patterns from historical data. This comparison allowed us to assess how well our model can identify high-risk areas for bat- and rodent-borne diseases, particularly in regions where notable zoonotic events have occurred. To go beyond deviance-based comparisons and assess whether high predicted risk aligns with actual outbreak locations, we extracted risk values at outbreak locations, compared with randomly sampled locations, and conducted Wilcoxon tests for significance. This has added another layer of validation. These steps help confirm that outbreaks systematically occur in high-risk regions predicted by the model, rather than just improving fit compared to a uniform spatial distribution.


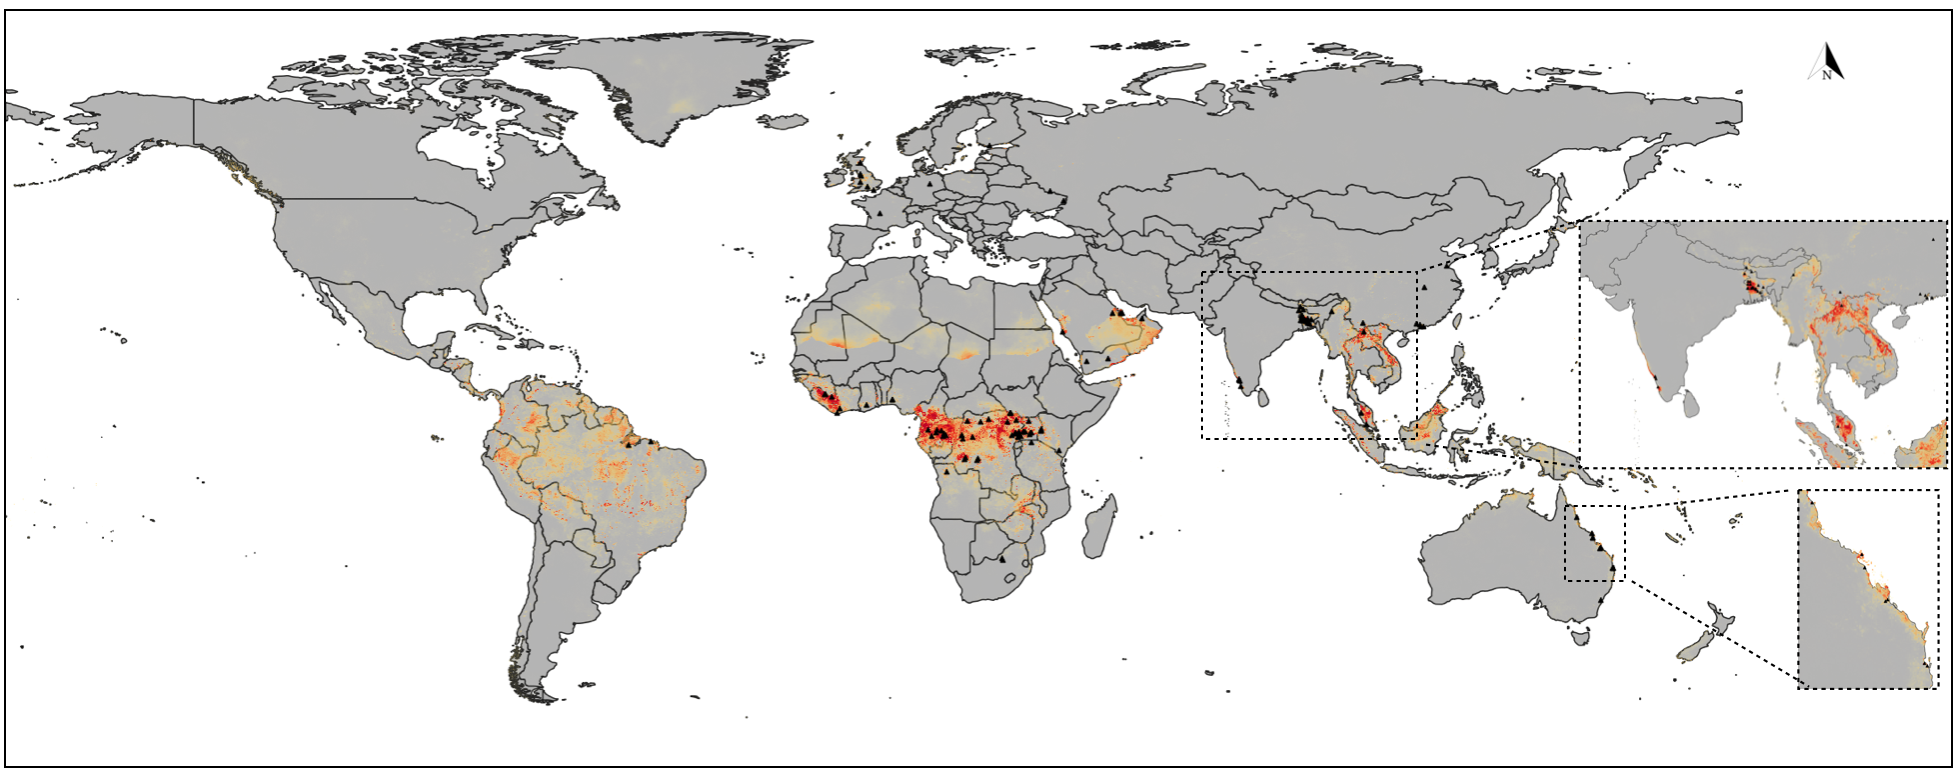


Figure S22: Risk map from the bat ensemble model along with outbreak patterns from historical data.

Wilcoxon rank sum test with continuity correction

W = 116810,

p-value < 2.2e-16

Alternative hypothesis: true location shift is greater than 0

The highly significant p-value suggests that actual bat risk is significantly higher than randomly sampled risk values. This supports the validity of the model risk prediction, i.e. the bat outbreak locations are not randomly distributed but align with higher-risk areas identified by your model.


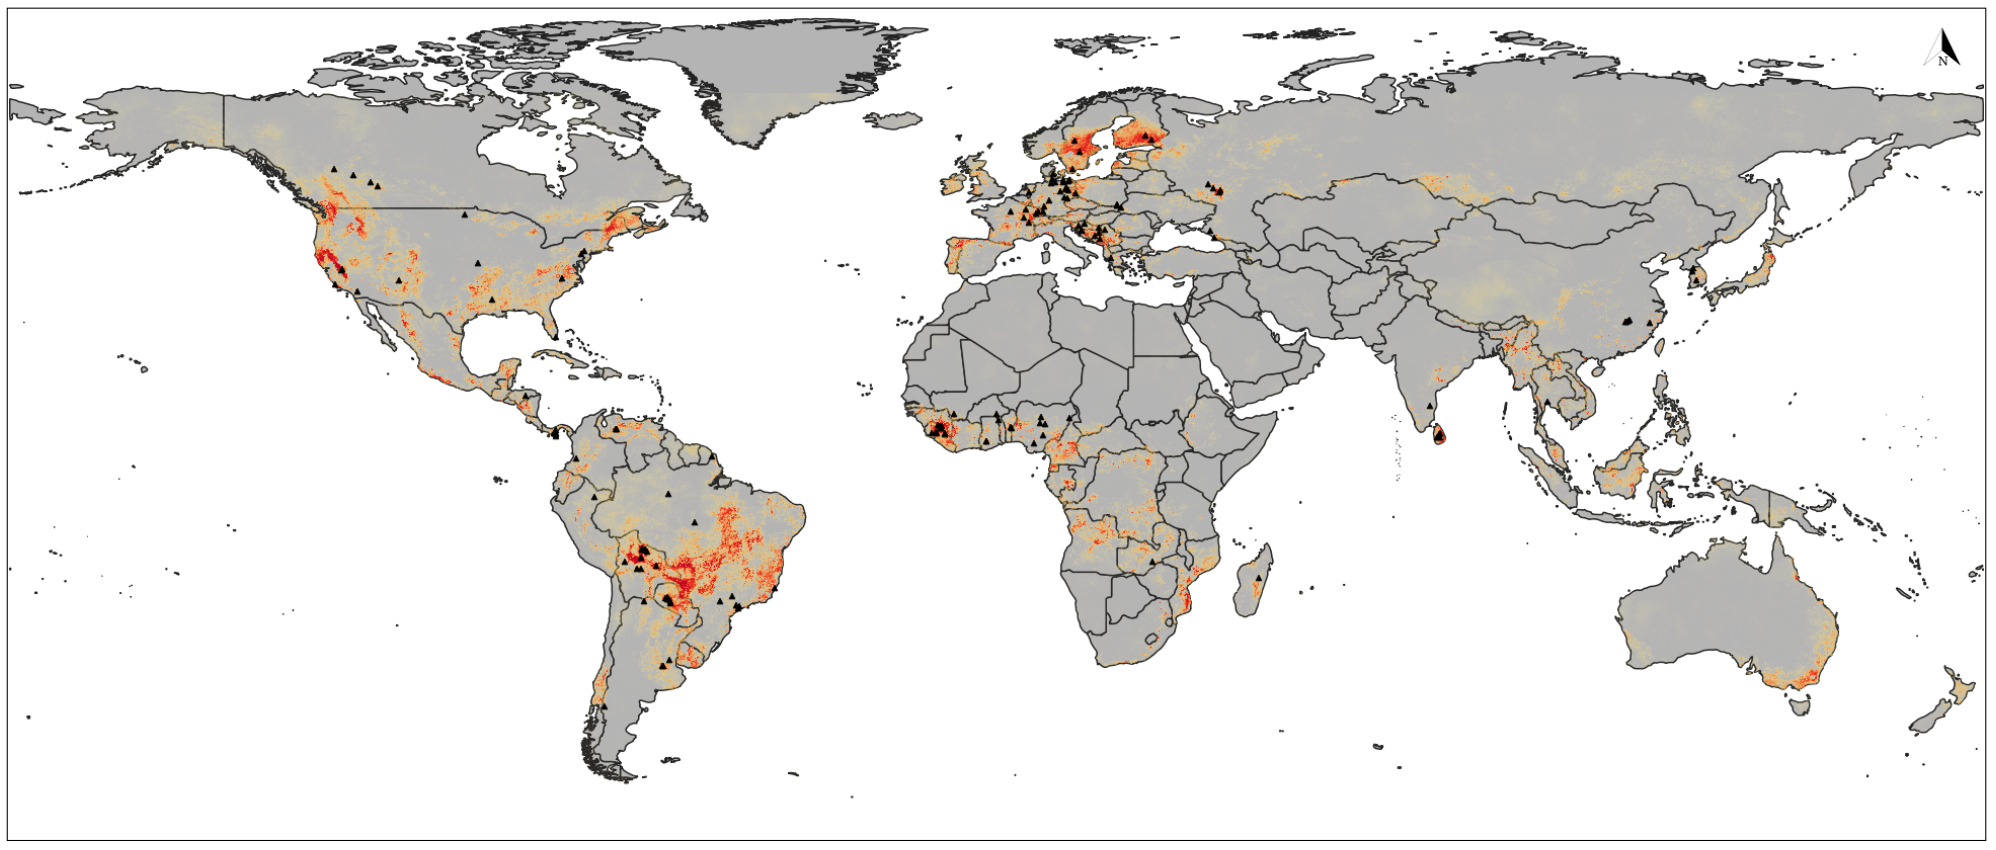


Figure S23: Risk map from the rodent ensemble model along with outbreak patterns from historical data.

Wilcoxon rank sum test with continuity correction

W = 143499,

p-value < 2.2e-16

alternative hypothesis: true location shift is greater than 0

The highly significant p-value suggests that actual bat risk is significantly higher than randomly sampled risk values. This supports the validity of the model risk prediction, i.e. the bat outbreak locations are not randomly distributed but align with higher-risk areas identified by your model.

**Potential interactions between covariates (temperature and precipitation)**

The AUC results of the Random forest models with and without interaction between temperature and precipitation suggest that adding interaction terms had a negligible impact on model performance.

- Model without interaction: AUC = 0.9784
- Model with interaction: AUC = 0.9777

Interpretation:

- Since both AUC values are nearly identical, the interaction terms do not significantly improve the model’s ability to discriminate between presence and absence.
- This could mean that:
  - The interactions are not crucial in explaining the variance in your data.
  - The main effects of the predictors already capture most of the patterns in disease risk.
